# Supplementary material for: Hierarchically structured Co@Fe (SA) -MoO/MoP electrocatalyst with tuned electronic states for thermodynamically optimized hydrogen adsorption in chloride-rich media
Source: Royal Society of Chemistry journal article supplement (doi:10.1039/d5ta07309j), 2025-01-01
Supplement: d5ta07309j1.pdf [file d5ta07309j1.pdf]

**Hierarchically Structured Co@Fe<sub>(SA)</sub>-MoO/MoP Electrocatalyst with Tuned Electronic States for Thermodynamically Optimized Hydrogen Adsorption in Chloride-Rich Media**

Muhaiminul Islam<sup>a</sup>, Jong woo Hong<sup>a</sup>, Kanguk Park<sup>b</sup>, Amar M. Patil<sup>a</sup>, Taehyeon Kim<sup>a</sup>, Sushanta K. Das<sup>a</sup>, Seungho Yu<sup>b</sup>, Seong Chan Jun<sup>a, \*</sup>.

<sup>a</sup>Nano-Electro-Mechanical Device Laboratory School of Mechanical Engineering, Yonsei University, Seoul 120-749, South Korea

<sup>b</sup>Energy Storage Research Center, Korea Institute of Science and Technology, 5, Hwarang-ro 14-gil, Seongbuk-gu, Seoul 02792, Republic of Korea

\*Corresponding Author

Prof. Seong Chan Jun

Email- scj@yonsei.ac.kr

**Material characterization and electrochemical analysis**

The morphological and structural characteristics of the developed catalysts were investigated using scanning electron microscopy (SEM) with the model MIRA3 TESCAN at Yonsei University (South Korea) and transmission electron microscopy (TEM) on a JEM-F200 (Japan) at the Yonsei University Joint Research Center (South Korea). Surface chemistry analysis was conducted using X-ray photoelectron spectroscopy (XPS) with a K-Alpha instrument (Thermo Fisher Scientific, UK) at the Structural Analysis Division of the Yonsei University Joint Research

Center. The survey spectrum was calibrated by referencing the C1s peak, which was fixed at 284.8 eV. Peak deconvolution of the XPS spectra was performed using the Peak Fit software. The peak positions were assigned based on standard photoelectron emission data from the National Institute of Standards and Technology (NIST) X-ray Photoelectron Spectroscopy Database (Standard Reference Database 20, Version 5.0). The crystalline properties of the catalysts were examined via X-ray diffraction (XRD) analysis, of Rigaku diffractometer (Maxima XRD-7000) utilizing a Cu-K $\alpha$  radiation source ( $\lambda = 0.15406$  A.U.), also at the Yonsei University Joint Research Center.

Electrochemical performance evaluations were performed in a three-electrode cell connected to an IVIUMnSTAT multichannel electrochemical workstation. The synthesized materials (1 cm  $\times$  1 cm), a graphite rod (Diameter 3.05mm with 99.9995% metal basis, ultra “F” purity), and a saturated Ag/AgCl (3.0 M KCl) electrode were used as the working, counter, and reference electrodes, respectively. To study OER/HER activities, Linear sweep voltammetry (LSV) measurement was performed at a scan rate of 2.0 mV s<sup>-1</sup> in alkaline freshwater medium (1.0 M KOH, pH~14 ), natural seawater and simulated seawater (1.0 M KOH +0.5 M NaCl, pH~12.9). Natural seawater(pH~13.2), filtered multiple times, was supplemented with 1.0 M KOH and stirred for 24 h. All electrolytes were saturated by the N<sub>2</sub> gas for 15 min before the experiments. The obtained linear sweep voltametric was corrected by the iR (~90%) compensation for the HER and OER following the equation<sup>1</sup>

$$E_{iR - corrected} = E_{(vs.RHE)} - i \times Rs \dots\dots\dots(i)$$

(Where, ‘i’ and ‘Rs’ are the current and resistance of the electrolytic solution respectively).

43 The as obtained potential was switch to RHE (Reversible hydrogen electrode ) potential using  
44 formula <sup>2</sup>;

$$45 \quad E_{RHE} = E_{Ag/AgCl} + 0.098 + 0.059pH.....(ii)$$

46 Stability of electrodes was examined by chronoamperometry at a fixed overpotential ( $\eta$ ) to  
47 achieve an initial current response of  $\sim 50 \text{ mA cm}^{-2}$  and  $\sim 100 \text{ mA cm}^{-2}$ . The cyclic voltammetry  
48 (CV) was conducted at various scan rates from 10 to 100  $\text{mV s}^{-1}$  to estimate the double-layer  
49 capacitance ( $C_{dl}$ ) that is associated with the electrochemical surface area (ECSA) of the  
50 synthesized catalysts by following equations <sup>3,4</sup>.

$$51 \quad C_{dl} = Ja - jc/2.....(iii)$$

52 Where,  $j_a$  and  $j_c$  is the anodic and cathodic voltametric current density.

$$53 \quad ECSA = C_{dl}/C_s.....(iv)$$

54 Where  $C_{dl}$  and  $C_s$  are double-layer capacitance and specific capacitance of a flat surface  
55 respectively.

56 The Faradaic efficiency for water splitting catalyzed by Co@Fe<sub>(SA)</sub>-MoO/MoP was computed  
57 by dividing the experimentally generated gas quantity by the theoretically calculated gas amount,  
58 determined through the charge passed through the electrode<sup>5</sup> :

59 Faradaic efficiency ( $\eta_F$ )

$$60 \quad \eta_F = \frac{n.F.V \text{ measurement}}{(I \cdot t \cdot V_m)}.....(v)$$

61 where  $\eta_F$  is the faradaic efficiency,  $n$  is the number of exchanged electrons in the reaction,  $F$  is  
62 the Faraday constant,  $V$  measurement is the volume of the measured H<sub>2</sub> or O<sub>2</sub> gas,  $I$  is the applied  
63 current,  $t$  is the electrolysis time, and  $V_m$  is the molar volume ( $22.4 \text{ dm}^3 \text{ mol}^{-1}$ ). Electrochemical

64 impedance spectroscopy (EIS) technique was studied by applying 5 mV amplitude AC voltage in  
 65 the frequency range (0.01 Hz to 100 kHz), to evaluate the charge transfer resistance of the  
 66 electrodes. For comparison of electrochemical performance, commercial Pt/C and RuO<sub>2</sub> catalysts  
 67 on carbon cloth (CC)-based electrodes were prepared. In this process, Pt/C (20 wt.% Pt) or RuO<sub>2</sub>  
 68 (15 mg), equivalent to the loading of Co@Fe<sub>(SA)</sub>-MoO/MoP on CC (1 cm × 1 cm), was dissolved in  
 69 500 μL of pure ethanol containing 10 μL of Nafion (5 wt.%) under continuous sonication for 40  
 70 minutes. The resulting ink was applied to both sides at dropped wise by the drop casting method  
 71 of the CC substrate (1 cm × 1 cm) and dried under vacuum at 60 °C overnight before being used  
 72 for electrochemical characterization.

### 73 **Turnover frequency (TOF) evaluation.**

74 To calculate the TOF, cyclic voltammetry (CV) curves for various fabricated materials were  
 75 recorded at a scan rate of 10 mV s<sup>-1</sup> in a 1.0 M PBS solution with a pH of approximately 6.5 (Figure  
 76 S15). The absolute values of the cathodic and anodic voltametric charges recorded during a single  
 77 measurement were summed. The quantity of active species (*n*) was then determined using the  
 78 following equation <sup>6</sup>:

$$79 \quad n = \frac{Q}{2F} = \frac{It}{2F} = \frac{IV}{2Fv} \dots\dots\dots(vi)$$

80 Then, TOF (s<sup>-1</sup>) is calculated following equation:

$$81 \quad TOF = \frac{|j| A}{nmF} \dots\dots\dots(vii)$$

82 Here, Q represents the voltammetric charge, F is the Faraday constant (C mol<sup>-1</sup>), I is the current  
 83 density (A cm<sup>-2</sup>), t is time (s), V is the voltage (V), v is the scan rate (V s<sup>-1</sup>), j is the current (A)

84 recorded during linear sweep voltammetry (LSV) tests,  $A$  is the electrode area ( $1\text{ cm}^2$ ), and  $m$   
85 denotes the number of electrons required to produce one molecule of  $\text{H}_2$  or  $\text{O}_2$  from  $\text{H}_2\text{O}$ . For  
86 the HER and OER,  $m$  is vi and vii, respectively.

## 87 **Assembly of Anion exchange membrane water electrolysis(AEMWE) assembly**

88 AEMWE devices were assembled using a  $4.5 \times 4.5\text{ cm}^2$  configuration.  $\text{Co@Fe(SA)-MoO/MoP}$   
89 was used as both the anode and cathode catalyst. For comparison, commercial  $\text{RuO}_2$  and  $\text{Pt/C}$  (5  
90 wt%) were dispersed in isopropanol with 5 wt% Sustainion XA9 ionomer and ultrasonicated for 1  
91 hour to prepare catalyst inks, which were then air-brushed onto gas diffusion layers to achieve  
92 the desired loadings. A PiperION® 40  $\mu\text{m}$  self-supporting anion exchange membrane and gas  
93 diffusion layers (carbon cloth and stainless-steel fiber felt) were employed in the assembly. A 1.0  
94 M KOH electrolyte was circulated through both electrodes at  $2\text{ mL min}^{-1}$ . Polarization curves were  
95 recorded potentiodynamically at  $5\text{ mV s}^{-1}$ , and durability tests were conducted under continuous  
96 water electrolysis. All data are presented without iR correction.

## 97 **Computational methods**

98 First-principles calculations were conducted using the projector-augmented wave method<sup>7</sup>  
99 and the Perdew-Burke-Ernzerhof (PBE) generalized gradient approximation<sup>8</sup>, as implemented in  
100 the Vienna Ab Initio Simulation Package (VASP)<sup>9</sup>. The calculations were carried out using a plane  
101 wave basis set with a cutoff energy of 520 eV, along with a gamma-centered  $2 \times 2 \times 1$  grid for  $k$ -  
102 point sampling. The electronic self-consistency and ionic relaxation loops were converged to  
103 thresholds of  $10^{-5}\text{ eV}$  and  $0.03\text{ eV/\AA}$ , respectively. All calculations were spin-polarized, and Van  
104 der Waals (vdW) interactions were incorporated using the DFT-D3 correction method<sup>10</sup>. The

calculations were conducted using the experimentally observed MoO<sub>2</sub>(-111) and MoP(101) slabs. The hydrogen adsorption energy was determined using the equation  $E_{\text{(ads\_H)}} = E_{\text{All}} - E_{\text{Substrate}} - 1/2E_{\text{(H\_2)}}$ , where  $E_{\text{All}}$ ,  $E_{\text{substrate}}$ , and  $E_{\text{(H\_2)}}$  represent the total energies of the complete system, the substrate, and the H<sub>2</sub> molecule, respectively. The Gibbs free energy for the hydrogen evolution reaction (HER) was evaluated using the equation  $\Delta G_{\text{H}}^* = \Delta E_{\text{ads}} + \Delta E_{\text{ZPE}} - T\Delta S$ , where  $\Delta E_{\text{ads}}$  represents the hydrogen adsorption energy on the slabs (H\*), and  $\Delta E_{\text{ZPE}}$  and  $\Delta S$  correspond to the zero-point energy and entropy differences between the free and adsorbed states, respectively. The density of states (DOS) was obtained to investigate the electronic properties.

#### **Battery Performance Test**

The cell measurements were performed using a standard two-electrode system, with the prepared catalysts serving as the cathode and a Zn foil plate as the anode in a 1.0 M KOH electrolyte. Polarization curves were recorded at a scan rate of 5 mVs<sup>-1</sup> using a ZIVE potentiostat, and power density curves were derived from the polarization data. Long-term stability was assessed through chronoamperometry discharge testing at 10 mA cm<sup>-2</sup> in both alkaline seawater and 1.0 M KOH electrolyte.

121

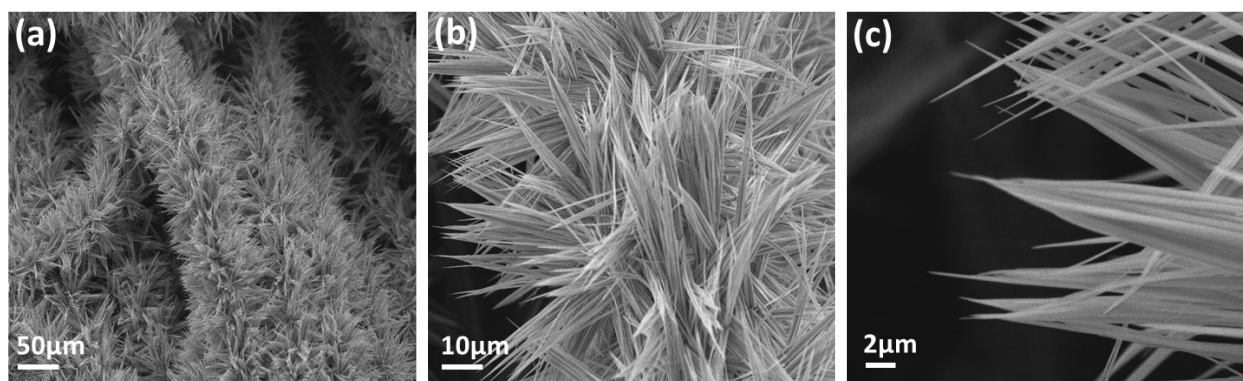

**Figure S1.**(a-c) SEM images of Co-OH NRs grown on CC substrate.

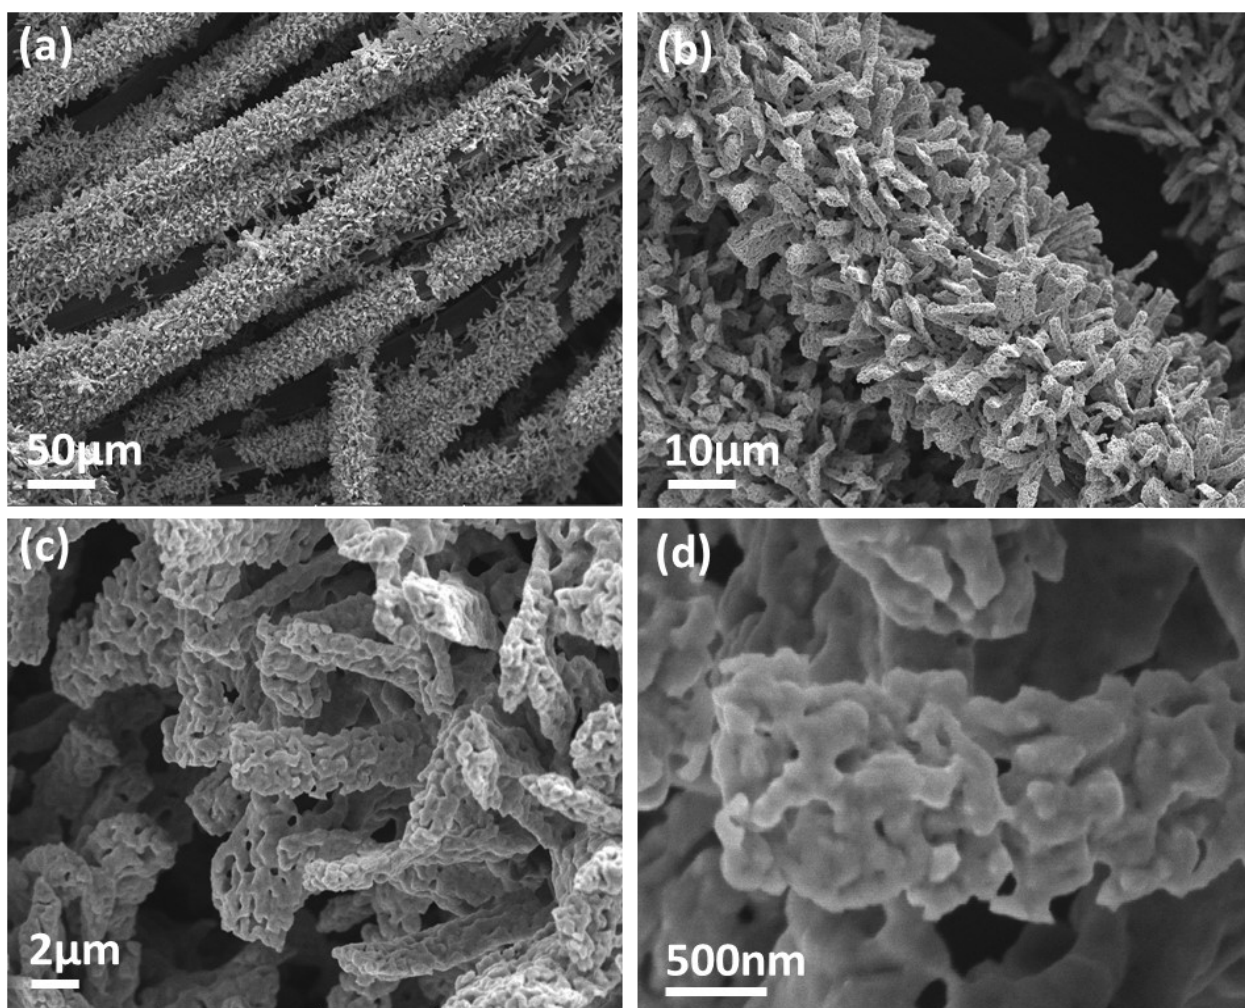

**Figure S2.**(a-d) SEM images of Co NRs grown on CC substrate after thermal treatment.



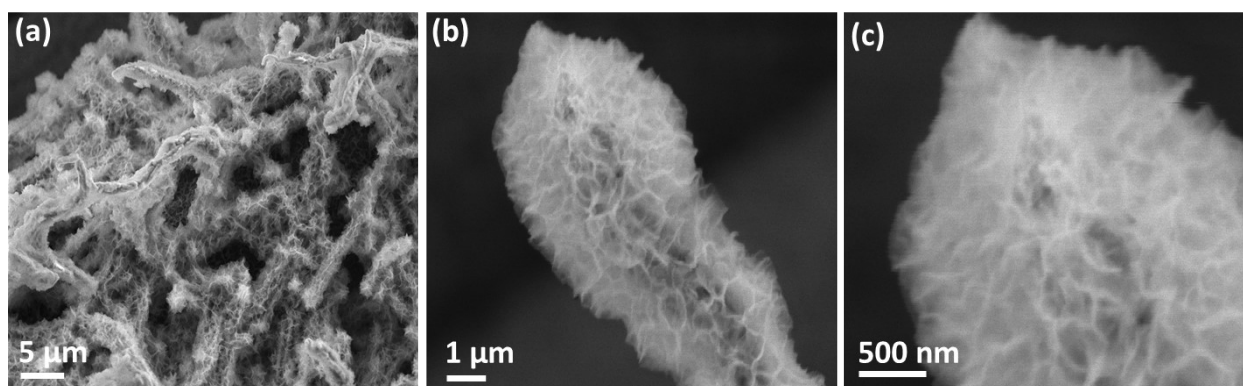

**Figure S3.**(a-c) SEM images of Co@MoO<sub>x</sub> grown on CC substrate.

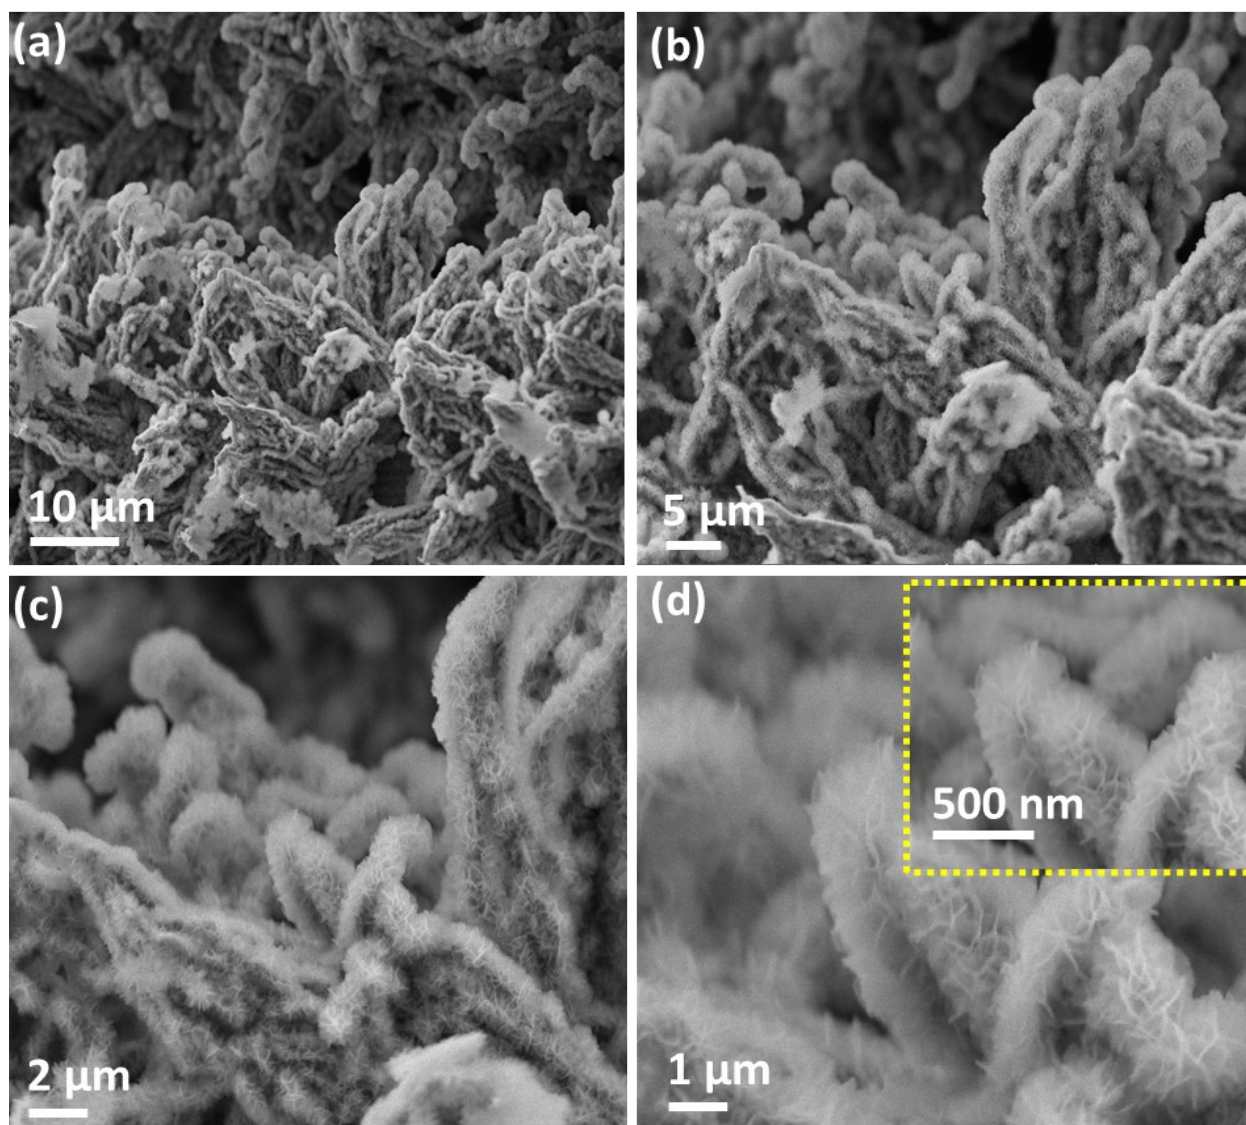

**Figure S4.**(a-d) SEM images of Co@Fe<sub>(SA)</sub>-MoO/MoP grown on CC substrate.

178

179

180

181

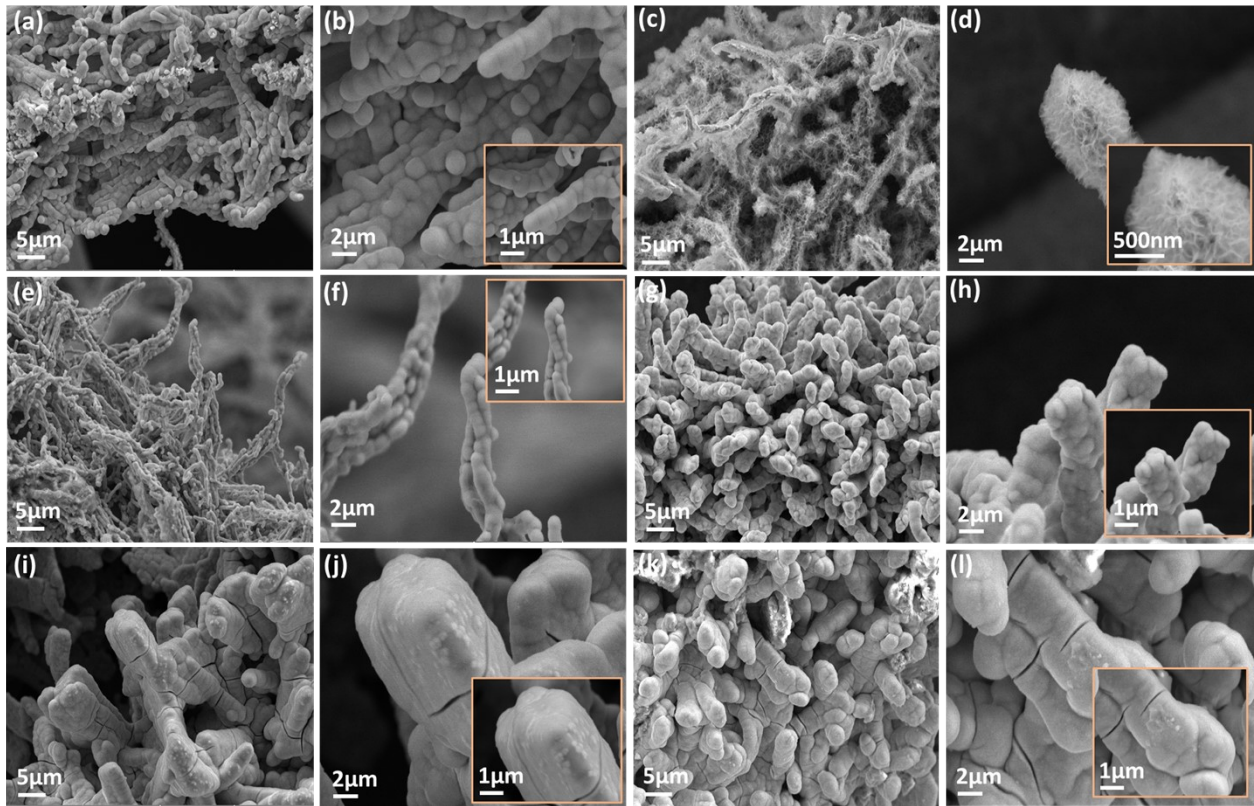

182

183 **Figure S5.**(a-b) SEM images of different time grown of MoO<sub>x</sub> on Co NRs on CC substrate.

184

185

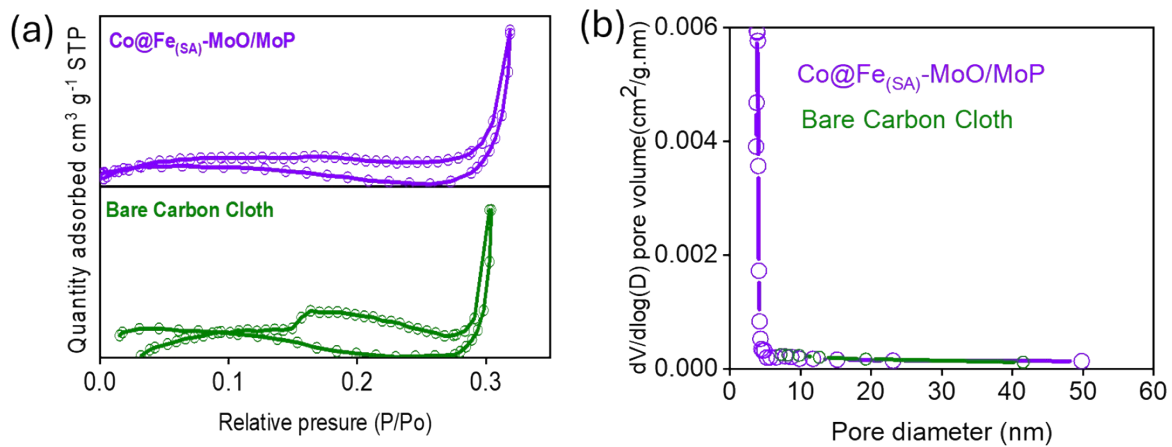

186

187 **Figure S6.** Nitrogen adsorption-desorption isotherms of (a) Co@Fe<sub>(SA)</sub>-MoO/MoP and bare  
188 carbon cloth; (b) Pore size distribution of Co@Fe<sub>(SA)</sub>-MoO/MoP and bare carbon cloth

189

190

191

192

193

194

195

196

197

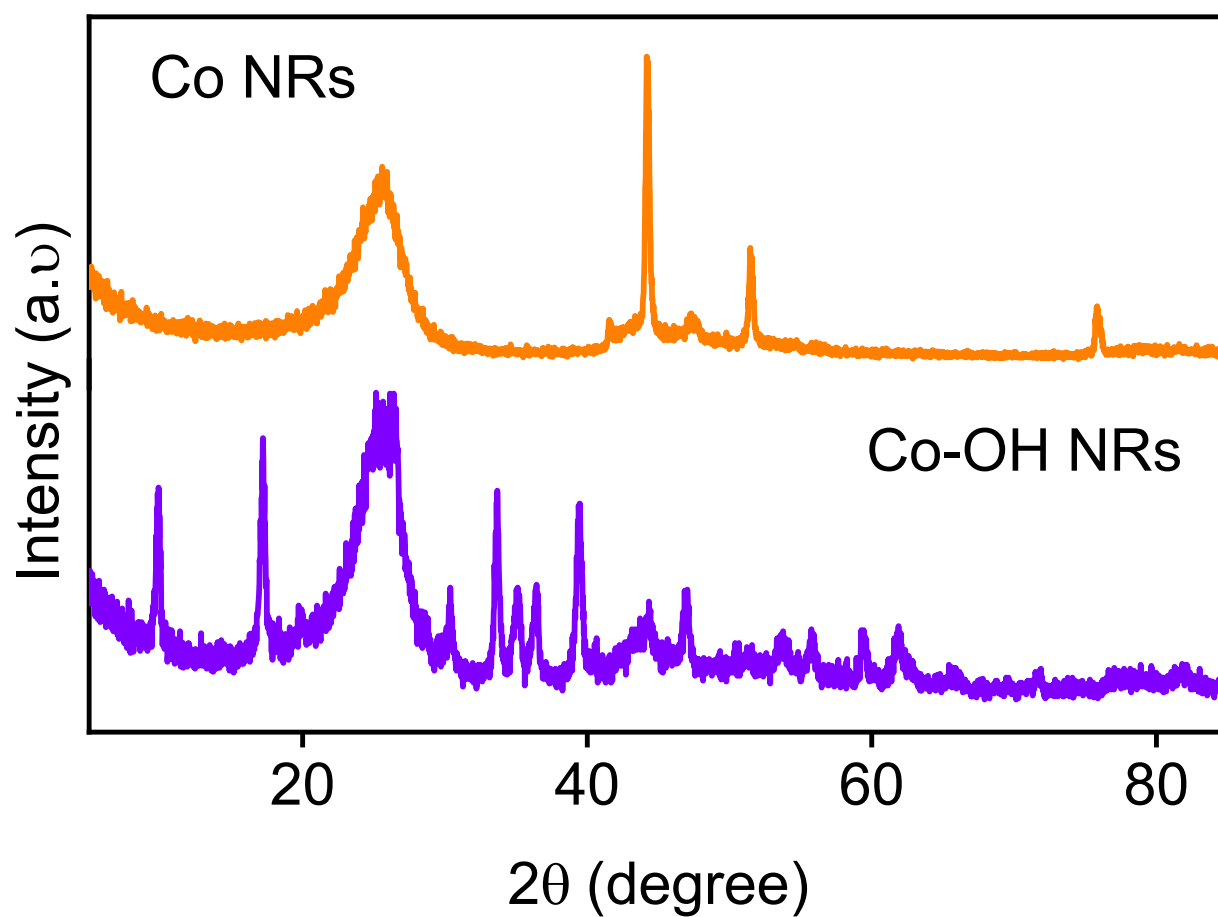

**Figure S7.** XRD analysis of Co NRs and Co(OH)<sub>2</sub> NRs prepared on CC.

209

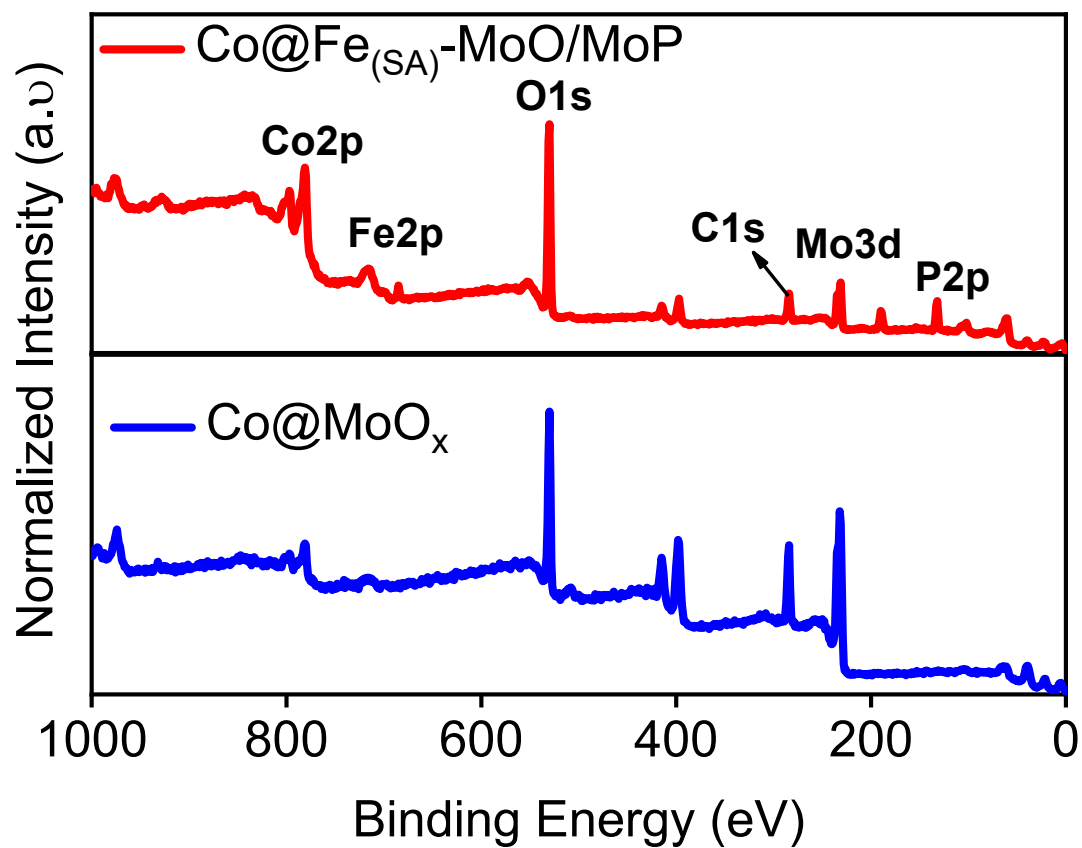

210

211 **Figure S8.** XPS survey scans of Co@Fe<sub>(SA)</sub>-MoO/MoP and Co@MoO<sub>x</sub> prepared on CC.

212

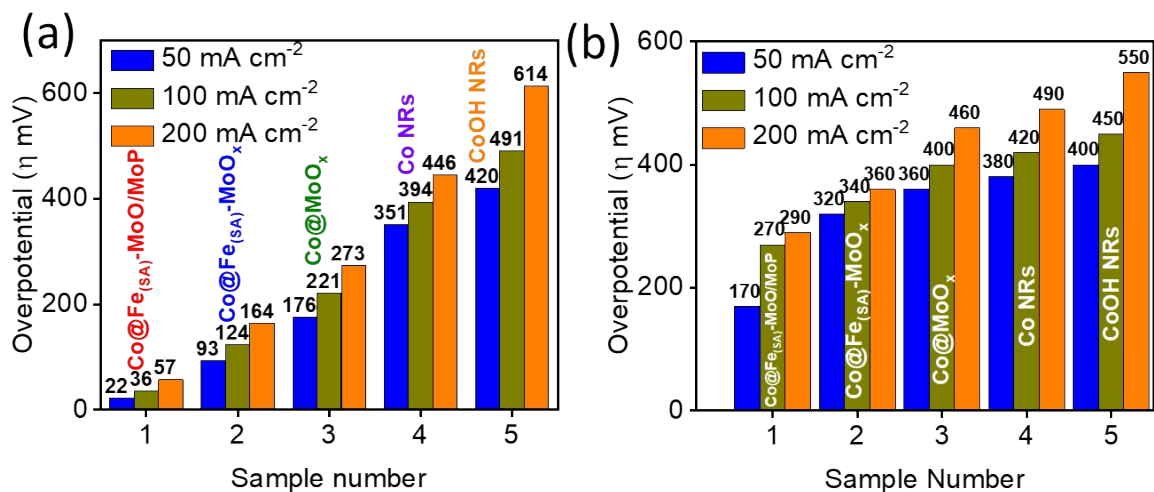

**Figure S9.** Overpotential comparison of the prepared samples towards (a) HER and (b) OER measured at 50, 100 and 200 mA cm<sup>-2</sup> current density in an alkaline freshwater environment.

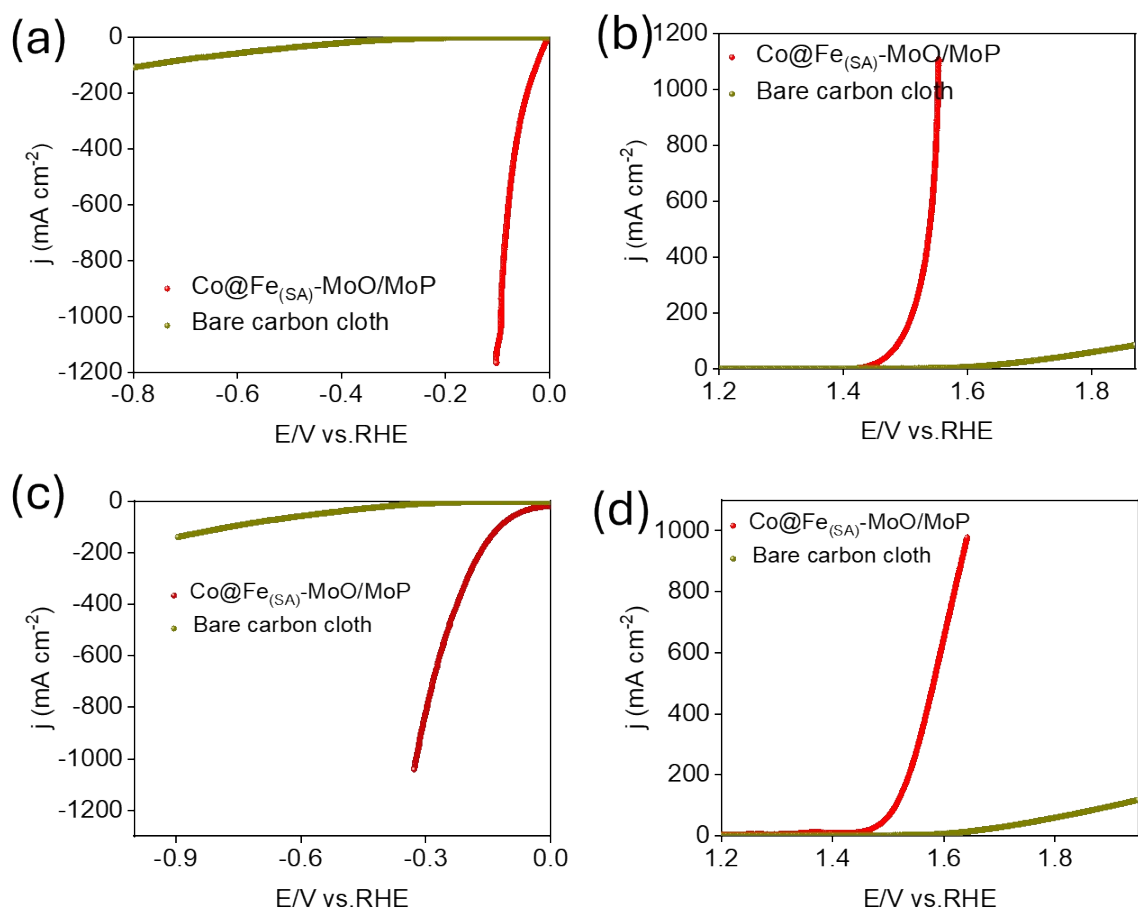

227

228

229 **Figure 10.** Comparison of (a-c) HER and (b-d) OER performance between Co@Fe<sub>(SA)</sub>-MoO/MoP  
 230 and bare carbon cloth in (a-b) 1.0 M KOH and (c-d) natural seawater electrolytes.



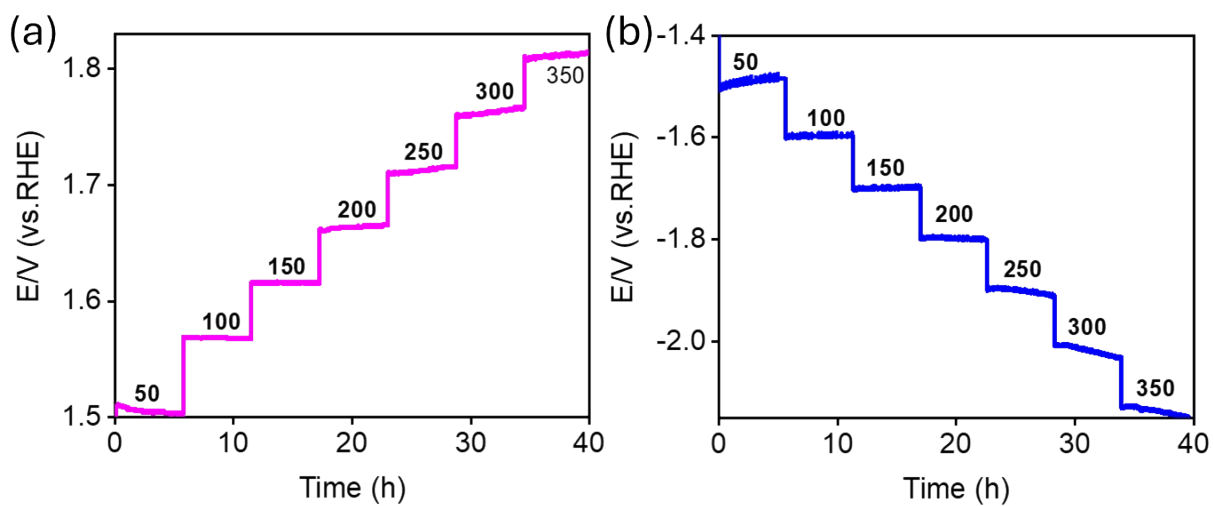

**Figure S11.** Multi-step stability of the Co@Fe<sub>(SA)</sub>-MoO/MoP (a) HER and (b) OER in an alkaline environment (1.0 M KOH).

247

248

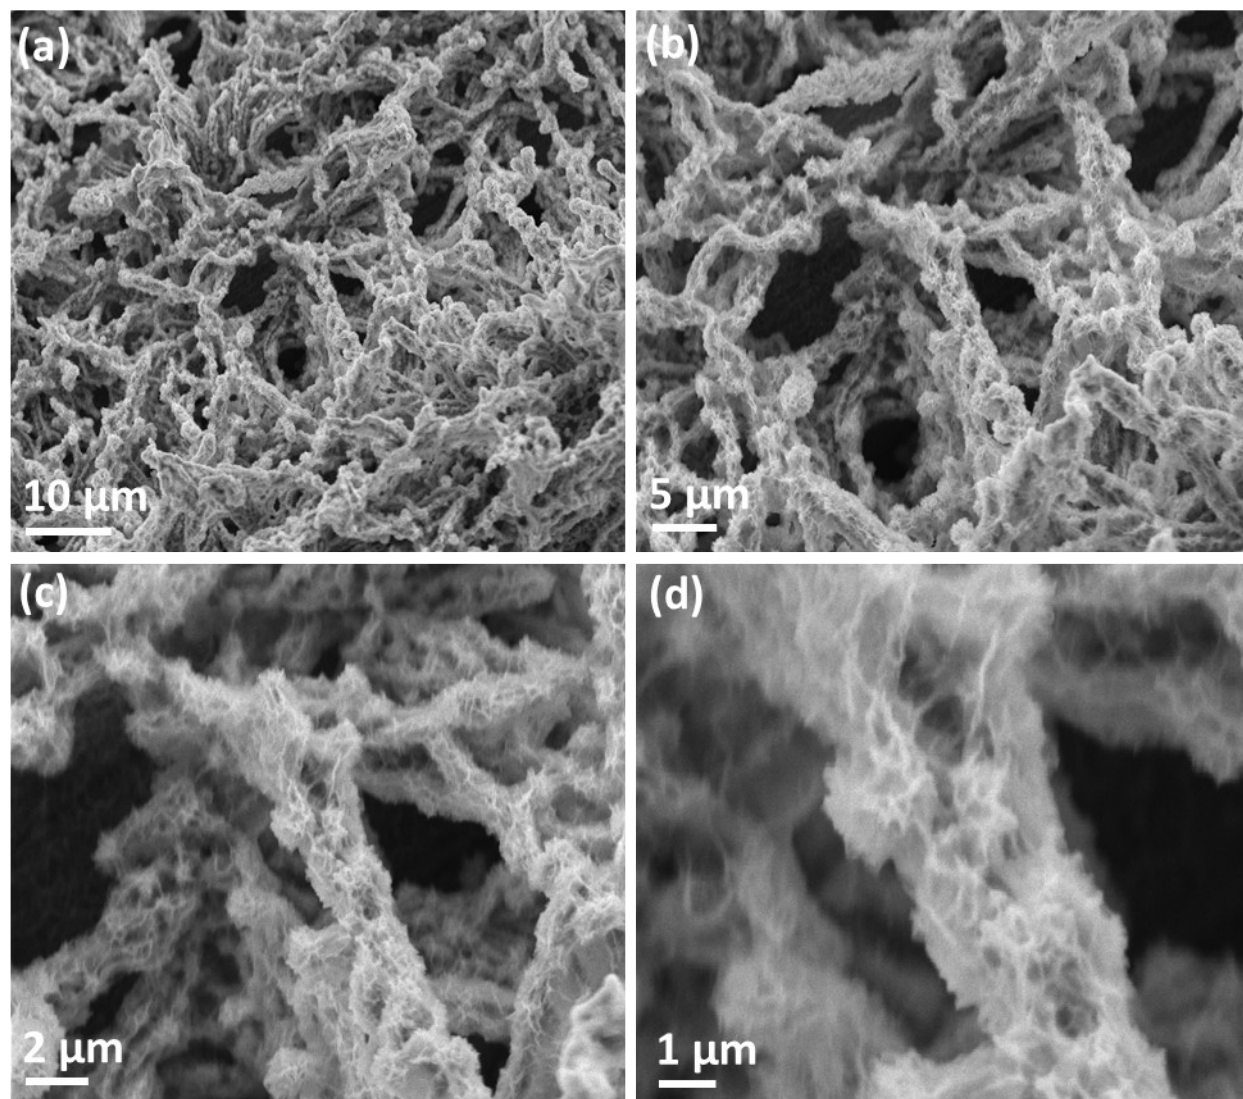

249

250 **Figure S12.** (a-d) FE-SEM images of the Co@Fe<sub>(sA)</sub>-MoO/MoP after HER stability tests at 100 mA  
251 cm<sup>-2</sup> current density

252

253

254

255

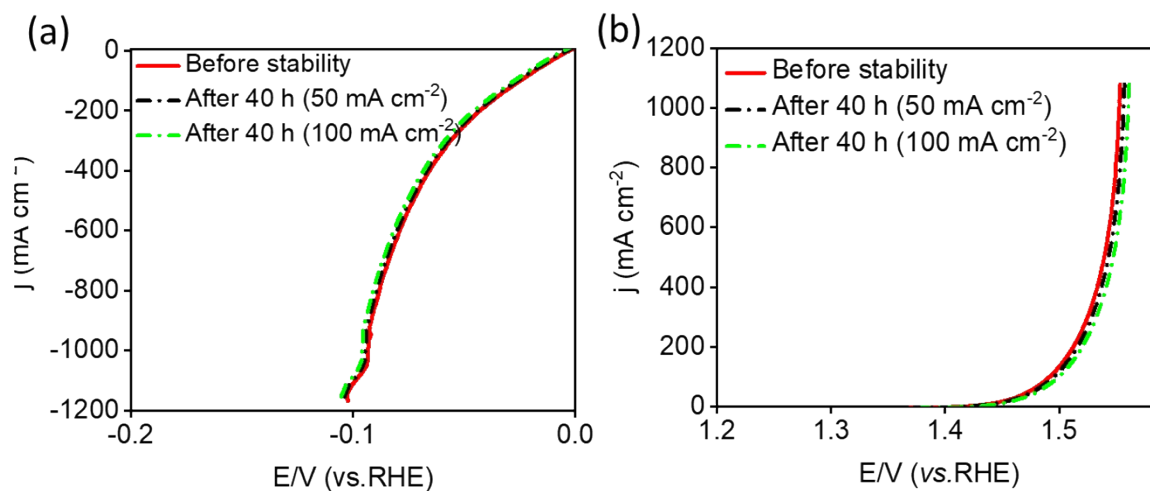

**Figure S13.**(a) HER and (b) OER LSV curves of the Co@Fe<sub>(SA)</sub>-MoO/MoP measured after long-term stability tests conducted at 50 mA cm<sup>-2</sup> and 100 mA cm<sup>-2</sup> current density, respectively

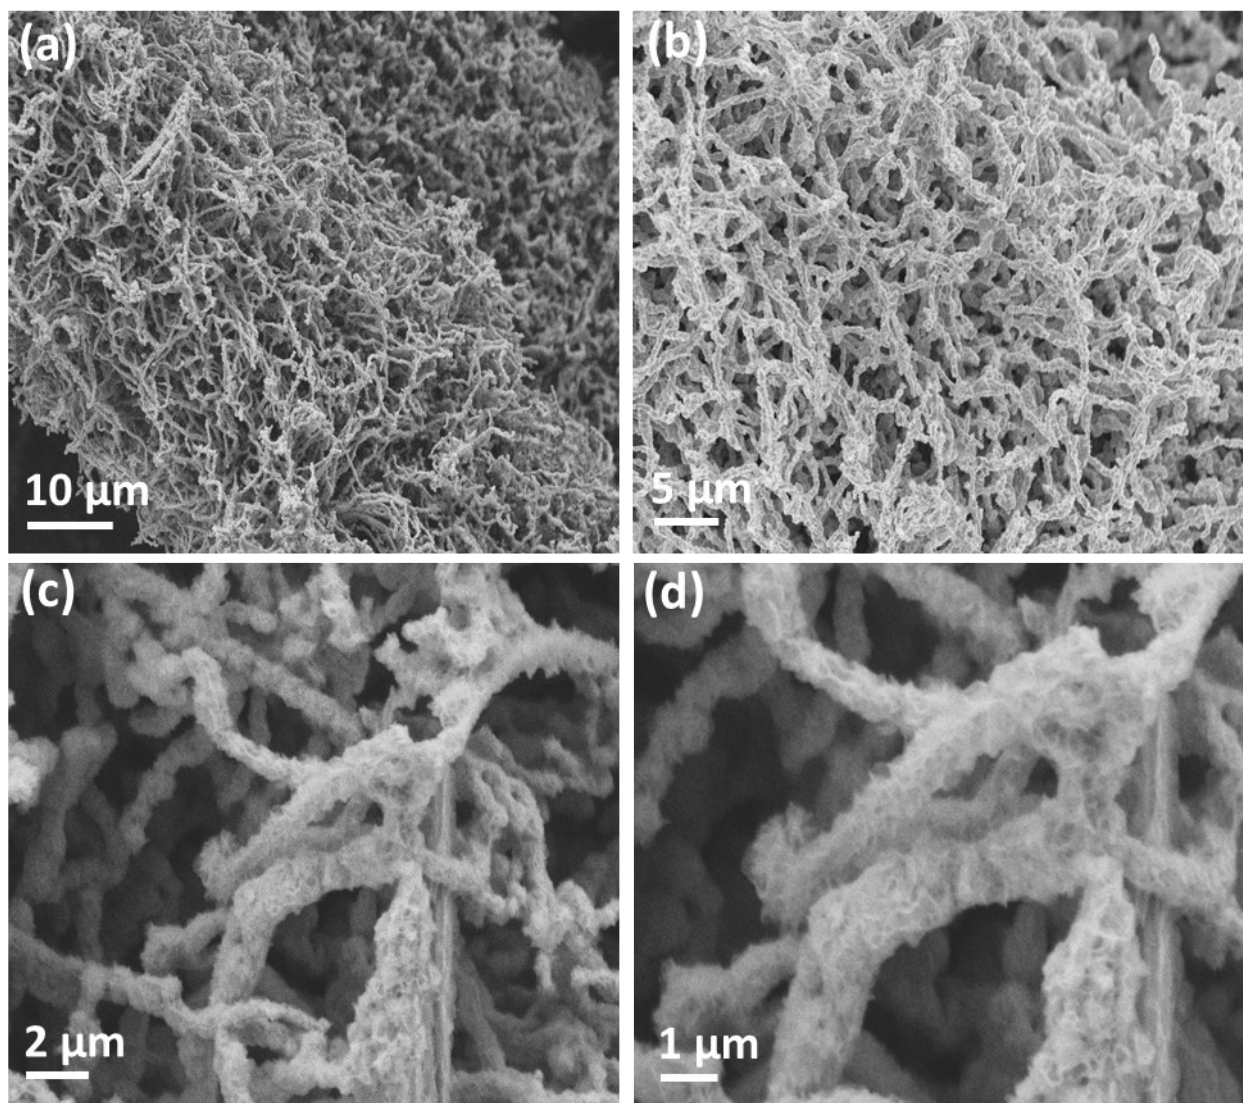

**Figure S14.**(a-d) FE-SEM images of the Co@Fe<sub>(SA)</sub>-MoO/MoP after OER stability tests at 300 mA cm<sup>-2</sup> current density

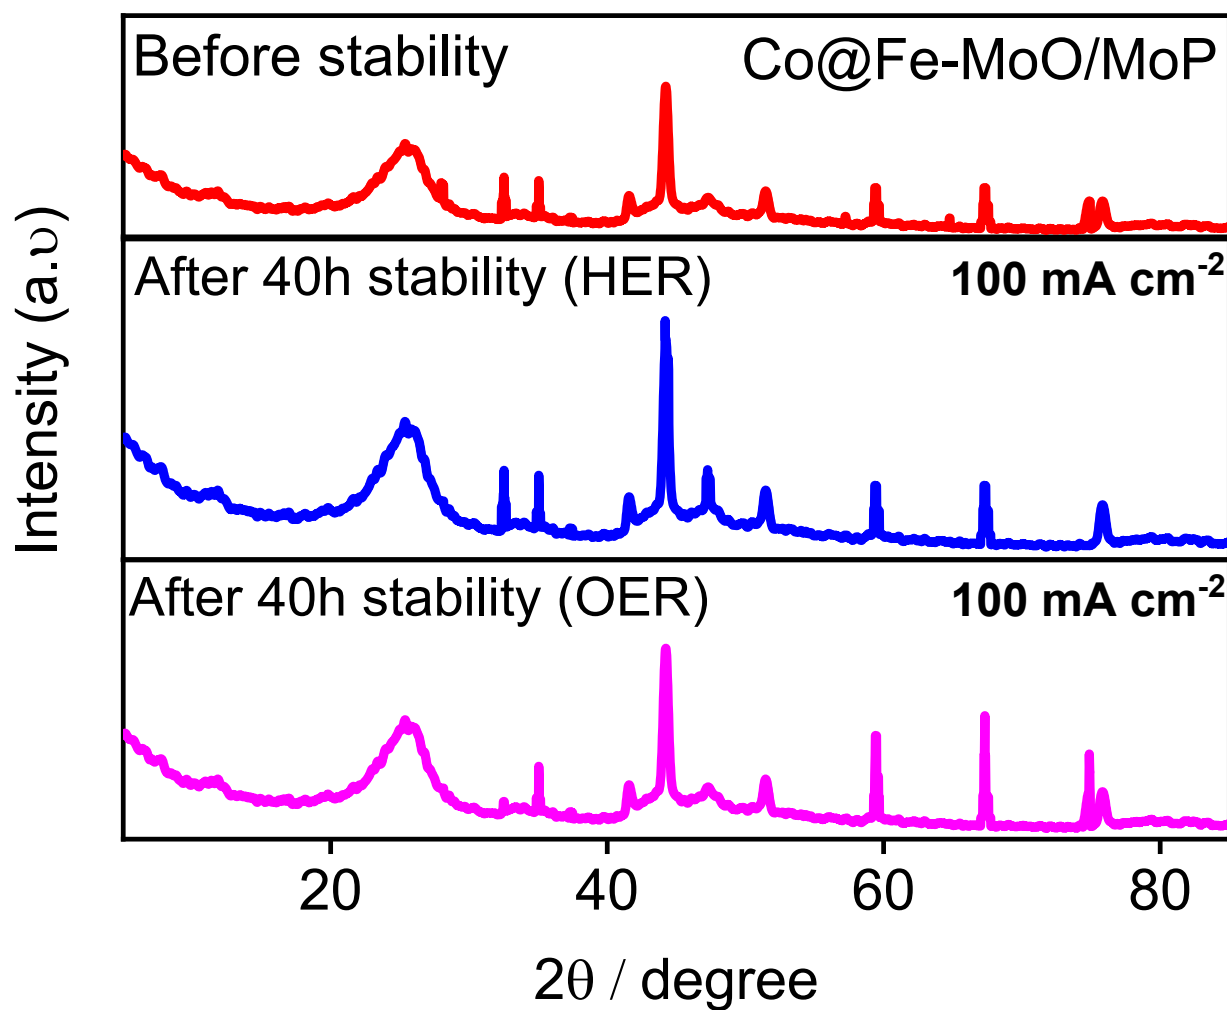

**Figure S15.** (a) XRD patterns of Co@Fe<sub>(SA)</sub>-MoO/MoP sample before and after long-term HER/OER stability tests conducted at 100 mA cm<sup>-2</sup> current density;

293

294

295

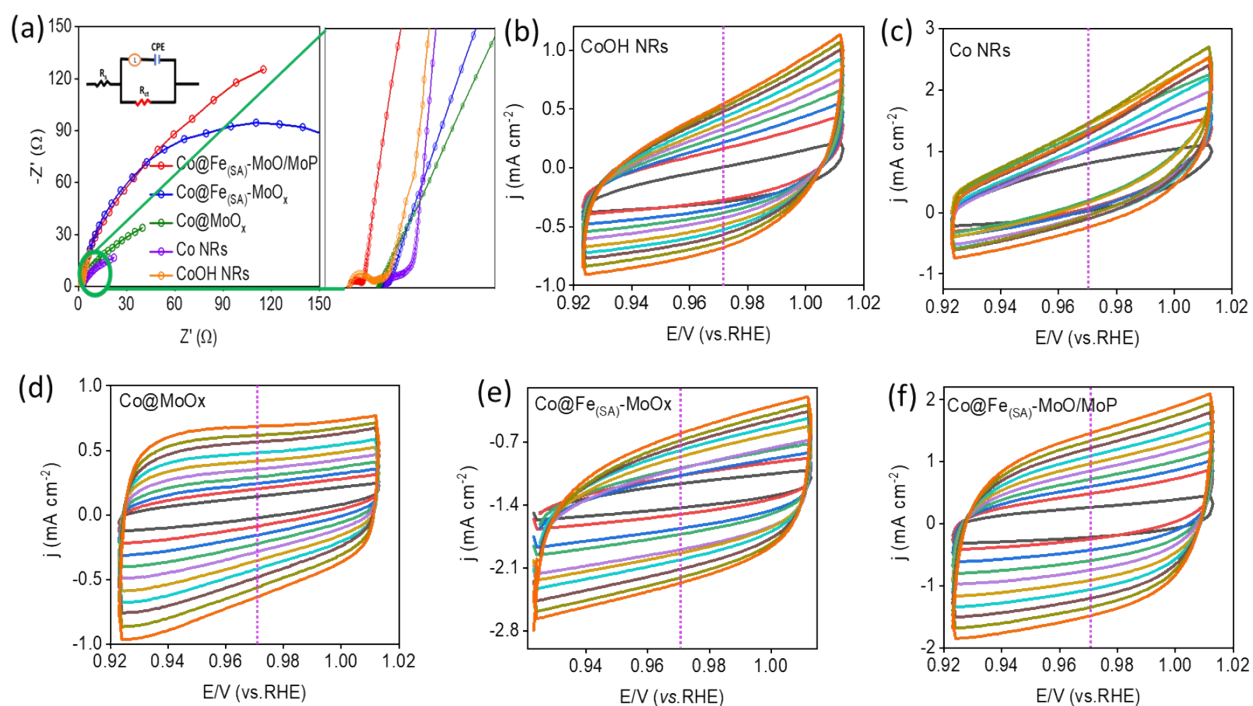

296

297 **Figure S16.** (a)Nyquist Plots from EIS Measurements in 1.0 M Alkaline Electrolyte with Enhanced

298 Resolution, .(b-f) CV curves of prepared samples measured between 10 to 100 mV s-1 scan rate

299 in alkaline electrolyte (1.0 M KOH).

300

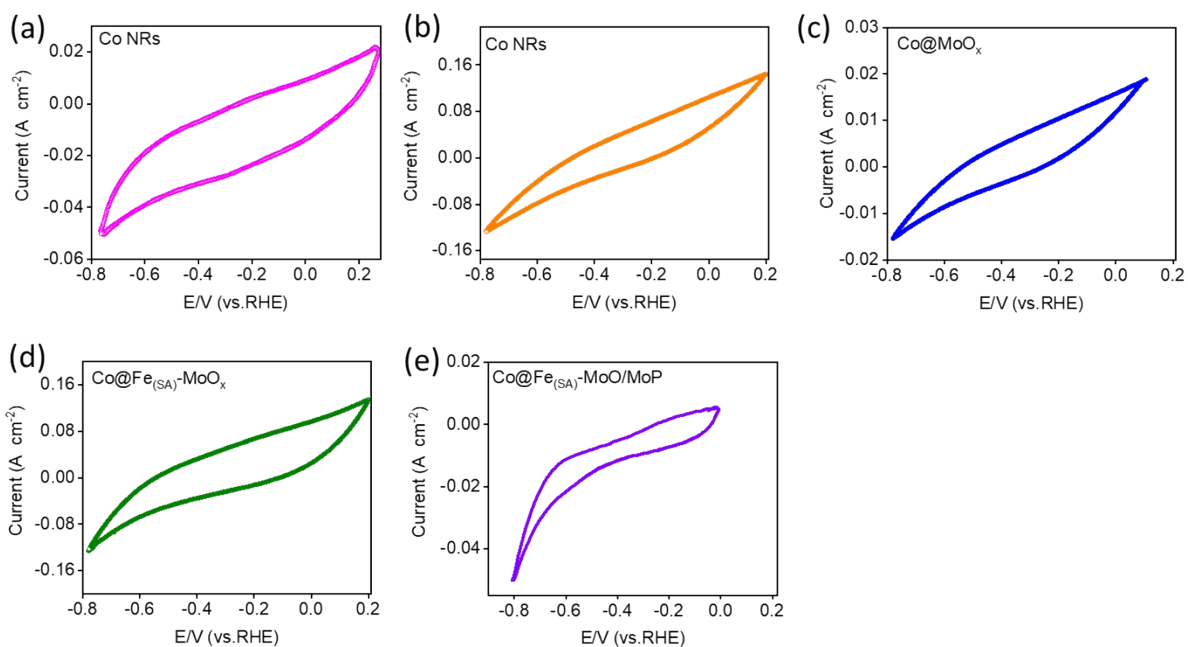

**Figure S17.**(a-e) CV curves of prepared samples measured at scan rate 10 mV s<sup>-1</sup> scan rate in 1.0 M PBS electrolyte.



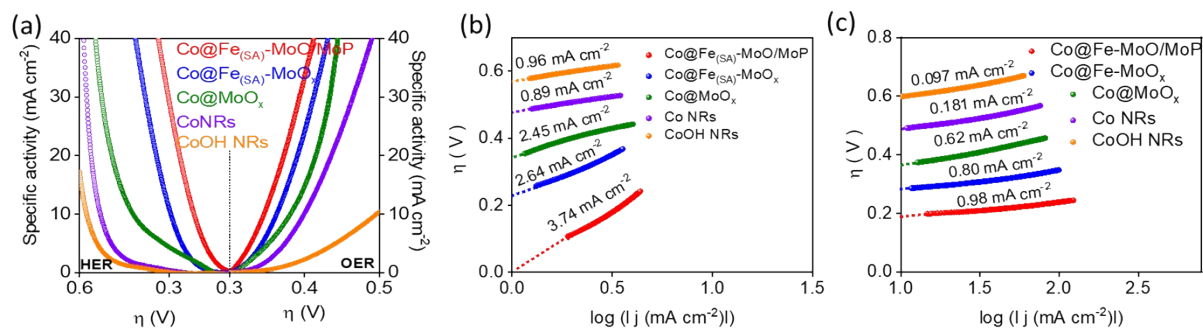

**Figure S18.** (a) TOF, analysis of the developed catalysts. (b) The exchange current density of  $\text{Co@Fe}_{(\text{SA})}\text{-MoO/MoP}$  in 1.0 M KOH

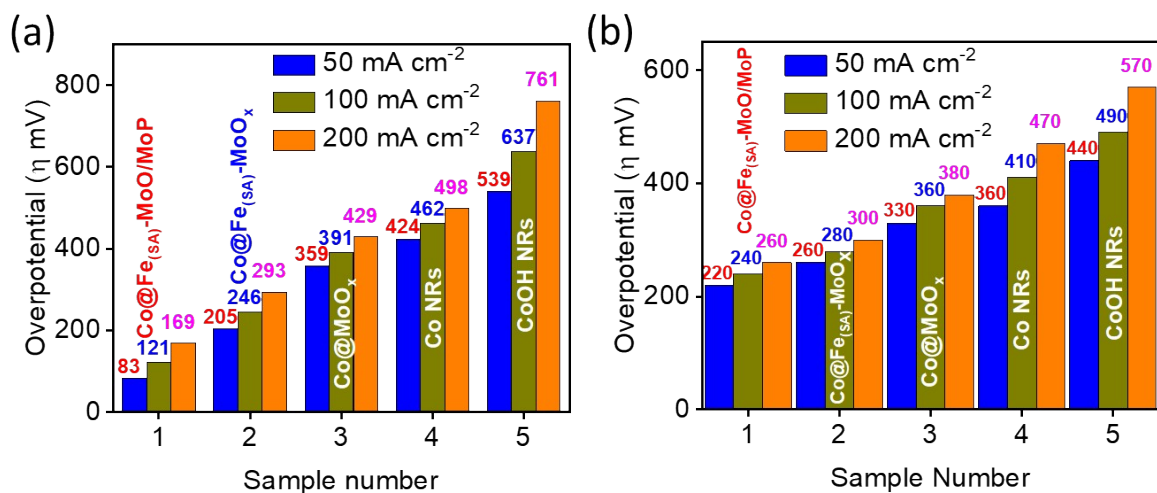

**Figure S19.** Overpotential comparison of the prepared samples towards (a) HER and (b) OER measured at 50, 100 and 200 mA cm<sup>-2</sup> current density in a natural seawater environment.

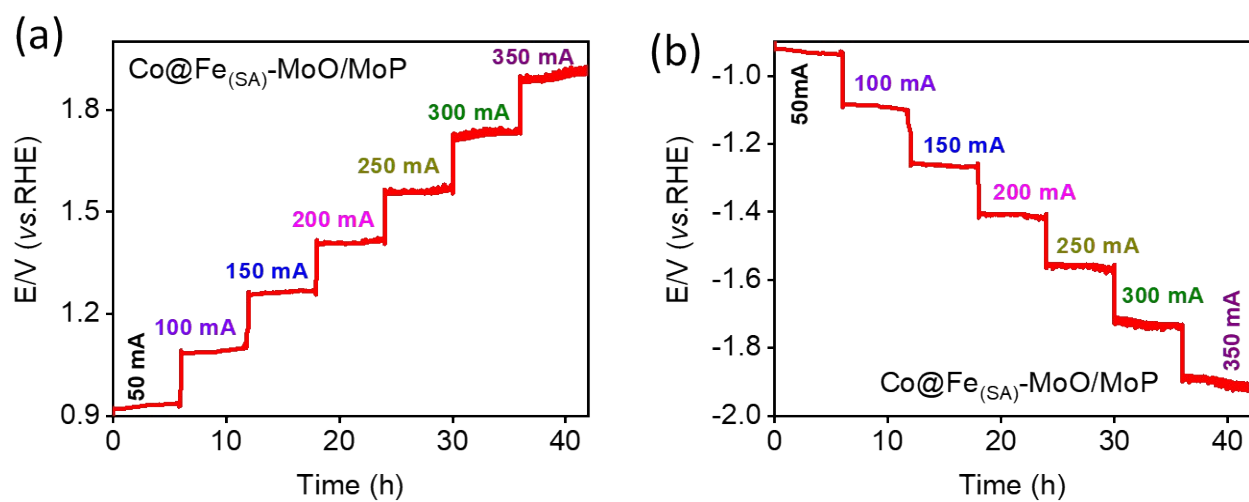

**Figure S20.** Multi-step of the Co@Fe<sub>(SA)</sub>-MoO/MoP (a)HER and (b) OER in a natural seawater environment.

368

369

370

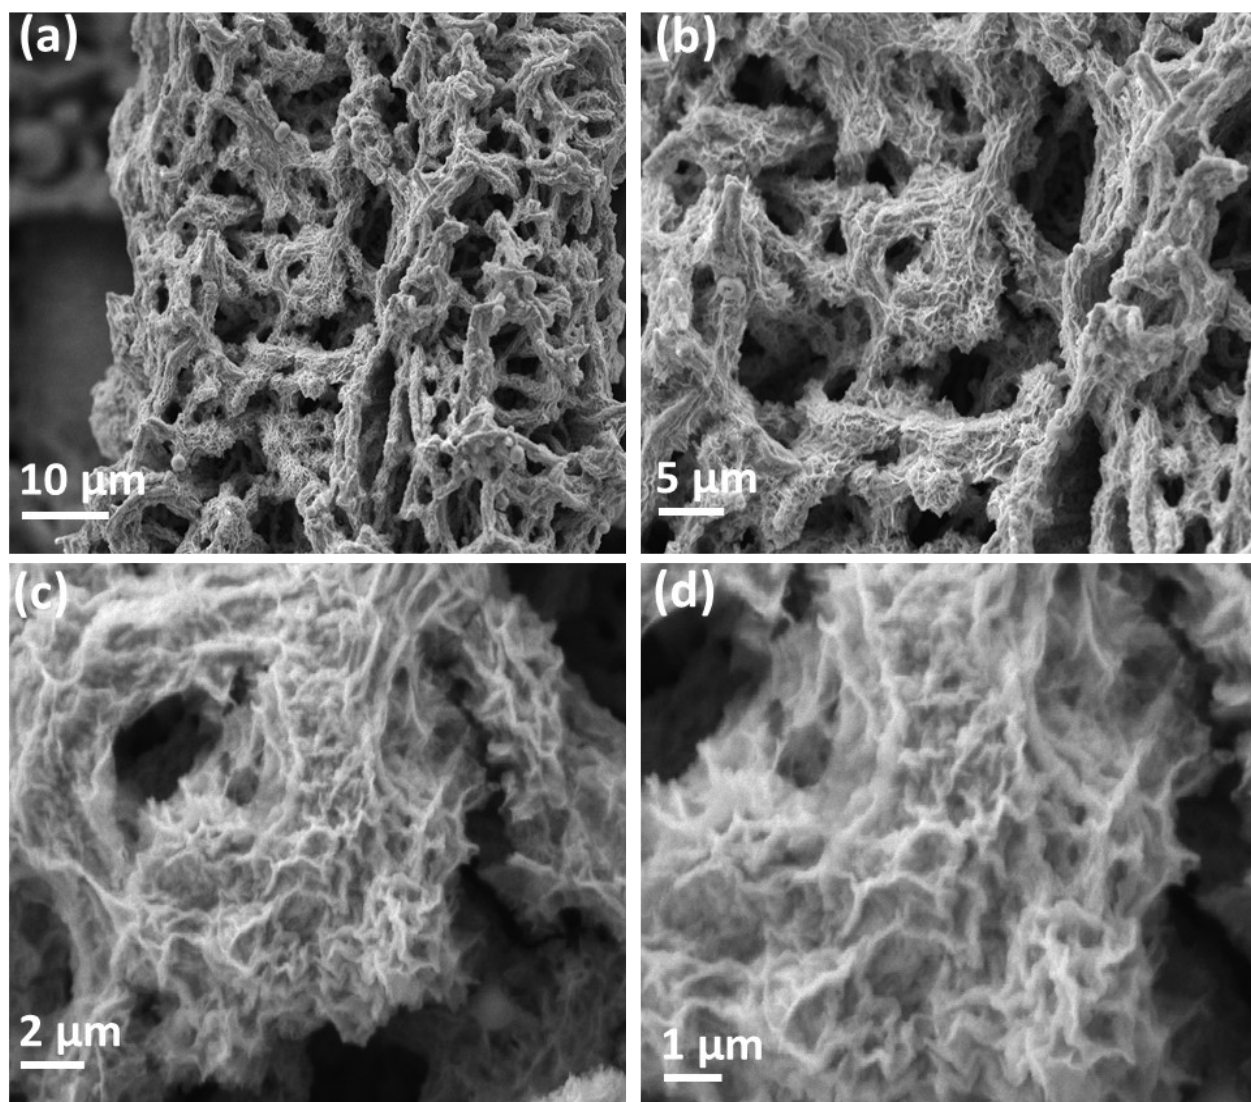

371

372 **Figure S21.** (a-d) FE-SEM images of the Co@Fe<sub>(SA)</sub>-MoO/MoP after HER stability tests at 100 mA

373 cm<sup>-2</sup> current density

374

375

376

377

378

379

380

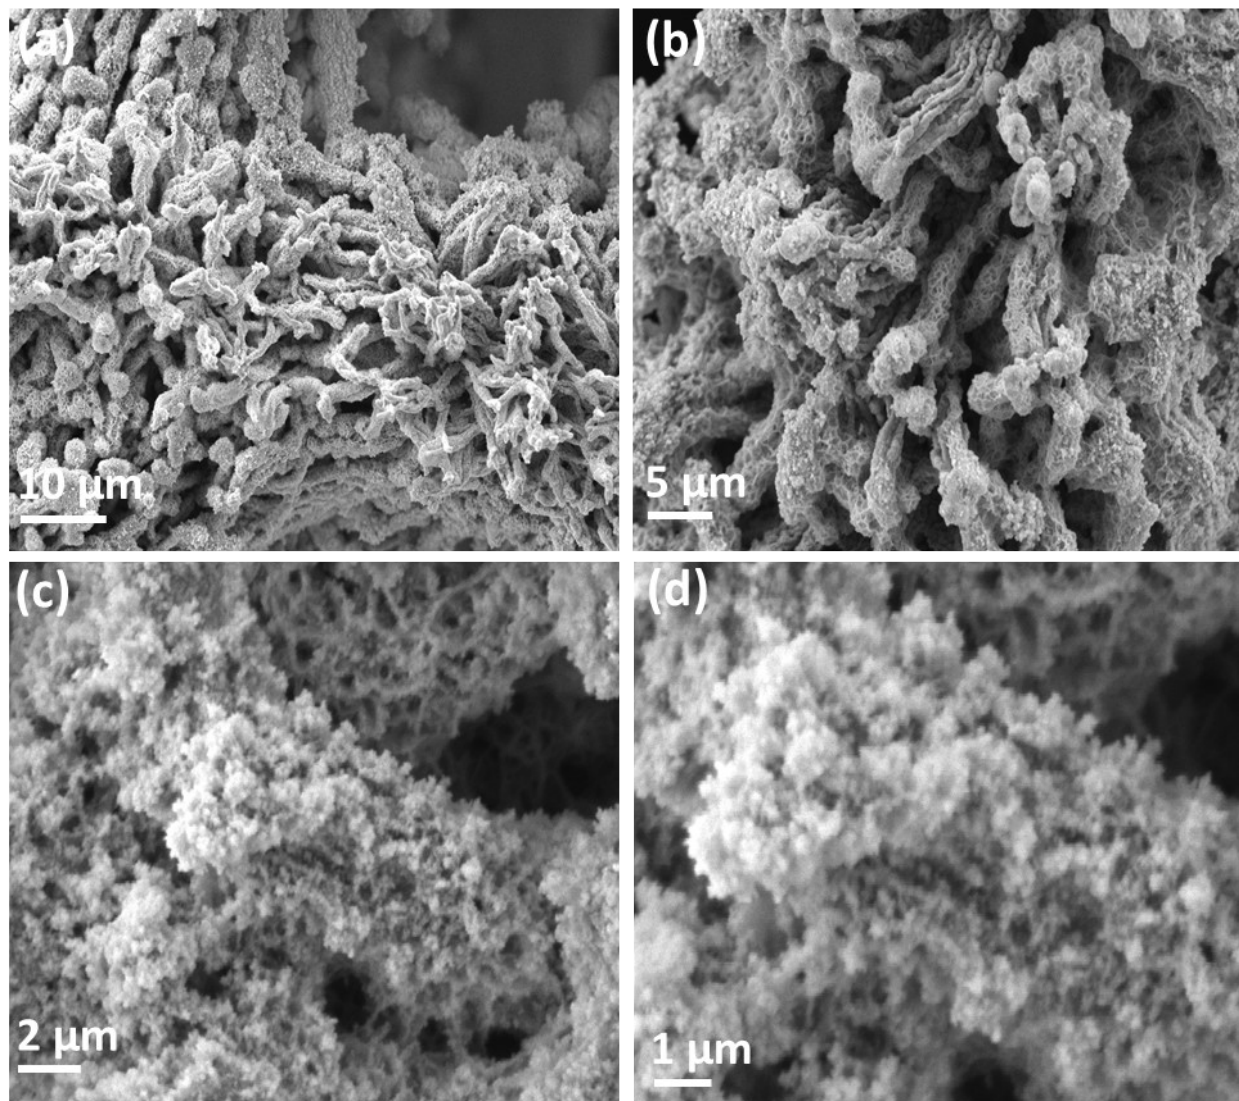

381

382 **Figure S22.** (a-d) FE-SEM images of the Co@Fe<sub>(SA)</sub>-MoO/MoP after OER stability tests at 100 mA

383 cm<sup>-2</sup> current density

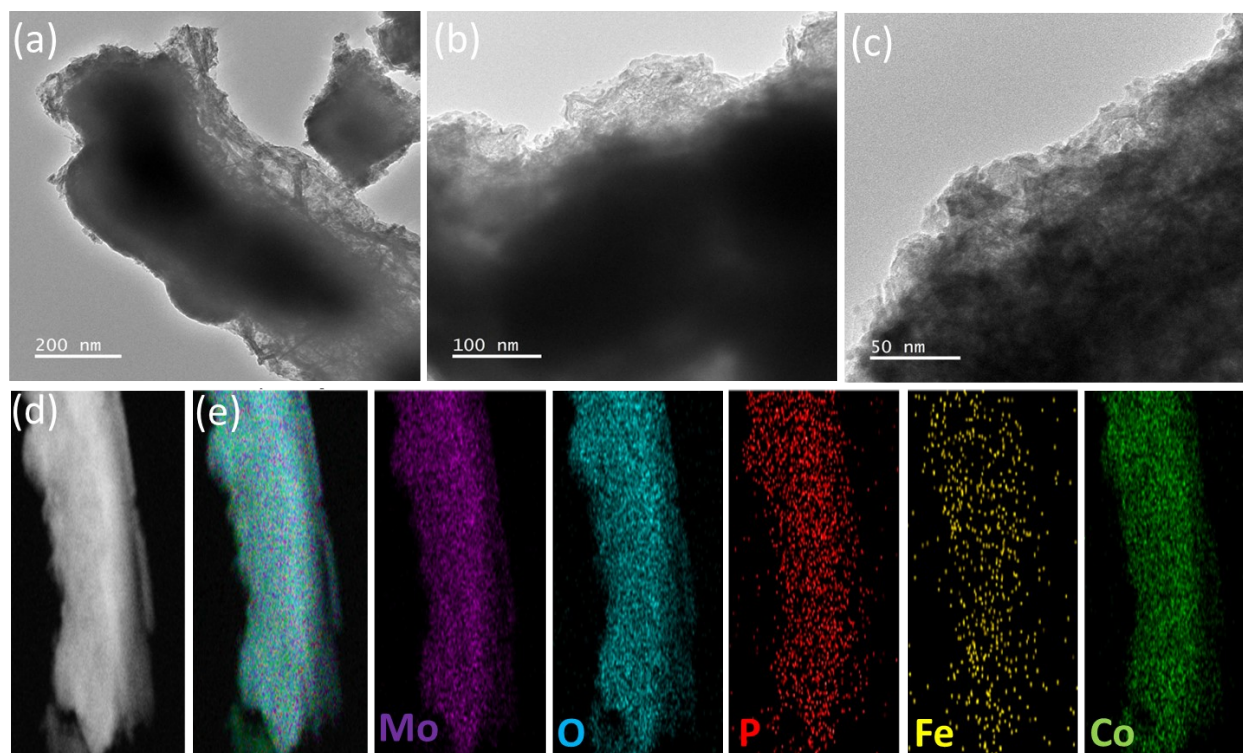

**Figure S23.** HR-TEM images of the Co@Fe<sub>(SA)</sub>-MoO/MoP after HER stability tests at 100 mA cm<sup>-2</sup> current density



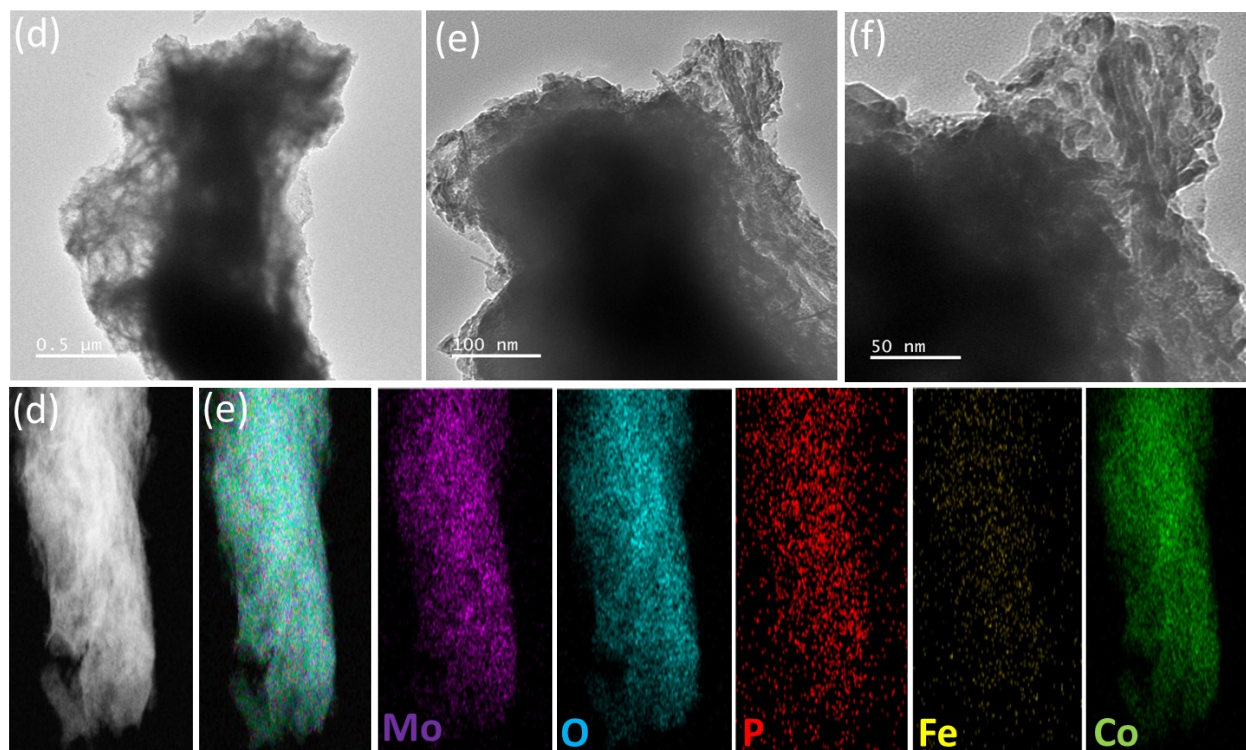

**Figure S24.**HR-TEM images of the Co@Fe<sub>(SA)</sub>-MoO/MoP after OER stability tests at 100 mA cm<sup>-2</sup> current density

410

411

412

413

414

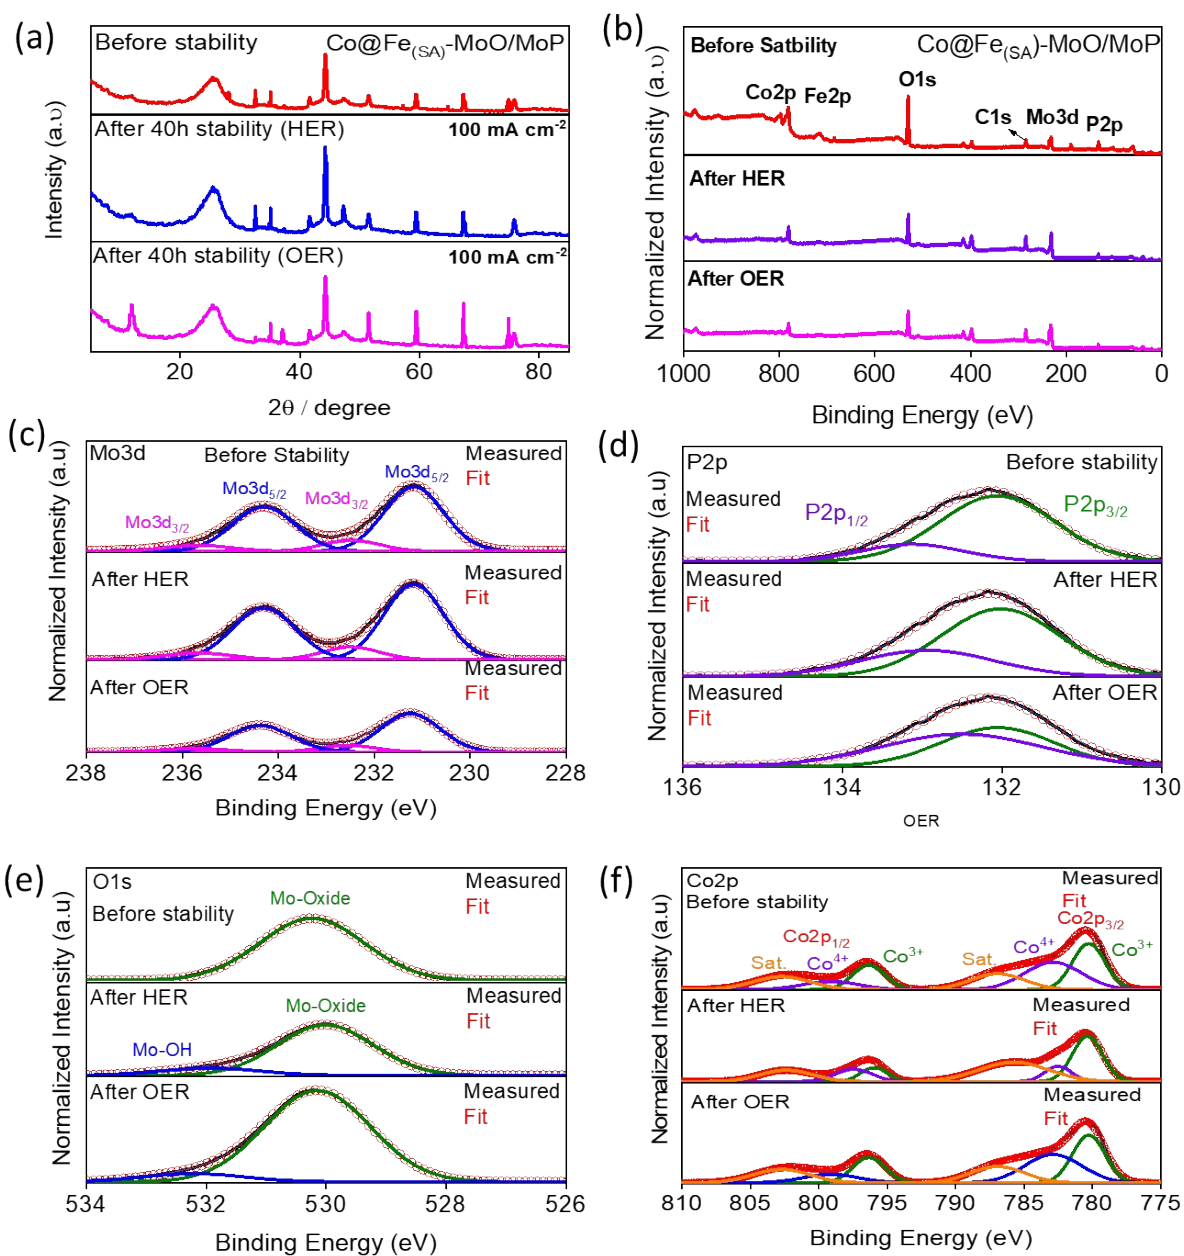

415



416 **Figure S25.** (a) XRD patterns of Co@Fe<sub>(SA)</sub>-MoO/MoP sample before and after long-term HER/OER  
 417 stability tests conducted at  $\sim 100 \text{ mA cm}^{-2}$  current density; (b) XPS survey scan comparison of  
 418 Co@Fe<sub>(SA)</sub>-MoO/MoP samples before and after HER/OER stability tests and with high-resolution  
 419 peak deconvolutions of (c) Mo3d, (d) P2p, (e) O1s, and (f) Co2p.

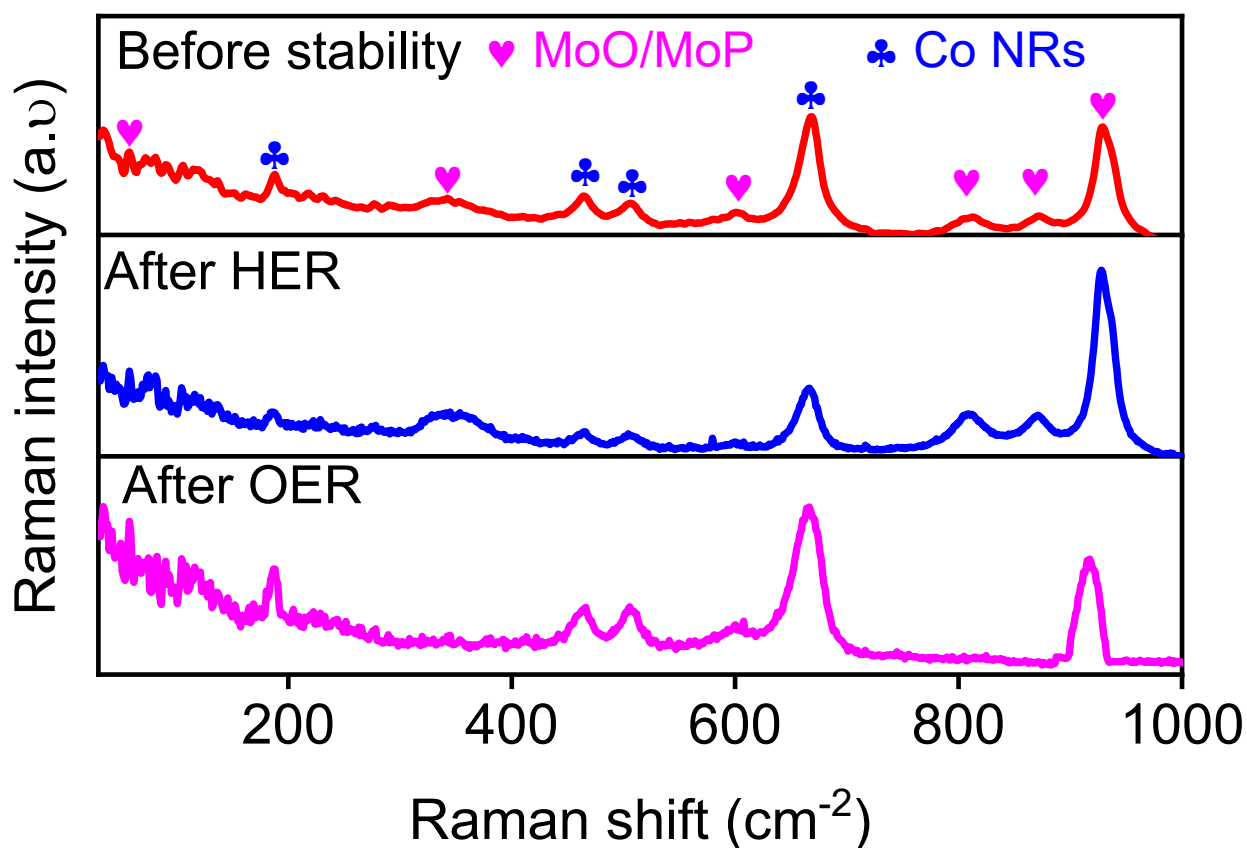

422  
 423 **Figure S26.** Raman spectra comparison of Co@Fe<sub>(SA)</sub>-MoO/MoP sample before and after HER and  
 424 OER stability measured at  $100 \text{ mA cm}^{-2}$  current density in natural seawater.

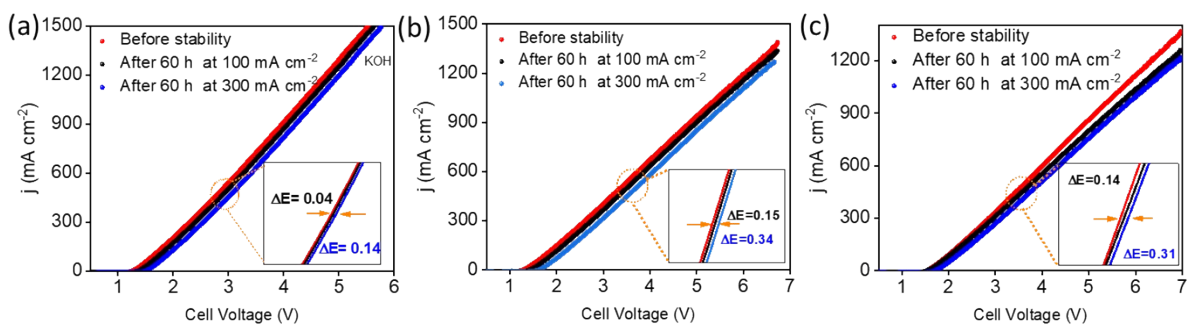

**Figure S27.** LSV curves of the Co@Fe<sub>(SA)</sub>-MoO/MoP<sub>(-/+)</sub> measured after long-term stability tests conducted in different electrolytes (a) KOH, (b) Natural seawater and (c) Simulated seawater at 100 mA cm<sup>-2</sup> and 300 mA cm<sup>-2</sup> current density, respectively

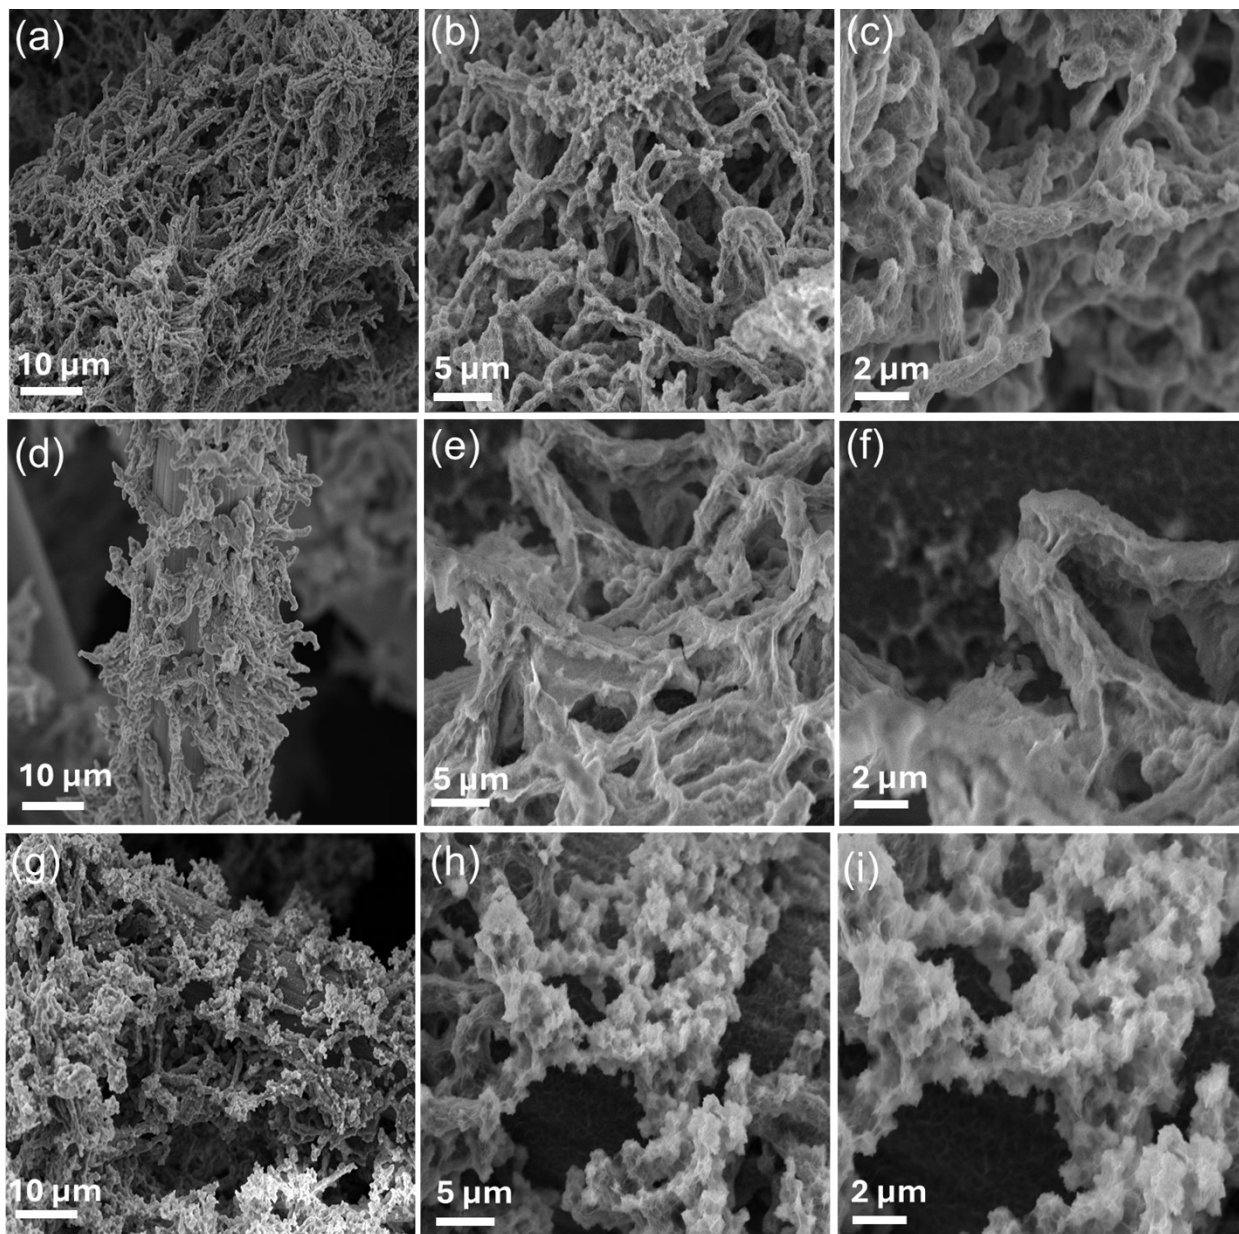

436 **Figure S28.** FE-SEM images of Co@Fe<sub>(SA)</sub>-MoO/MoP after device stability tests in different  
 437 electrolytes: (a-c) 1.0 M KOH, (d-f) simulated seawater, and (g-i) natural seawater, showing the  
 438 morphological changes after prolonged testing.

439

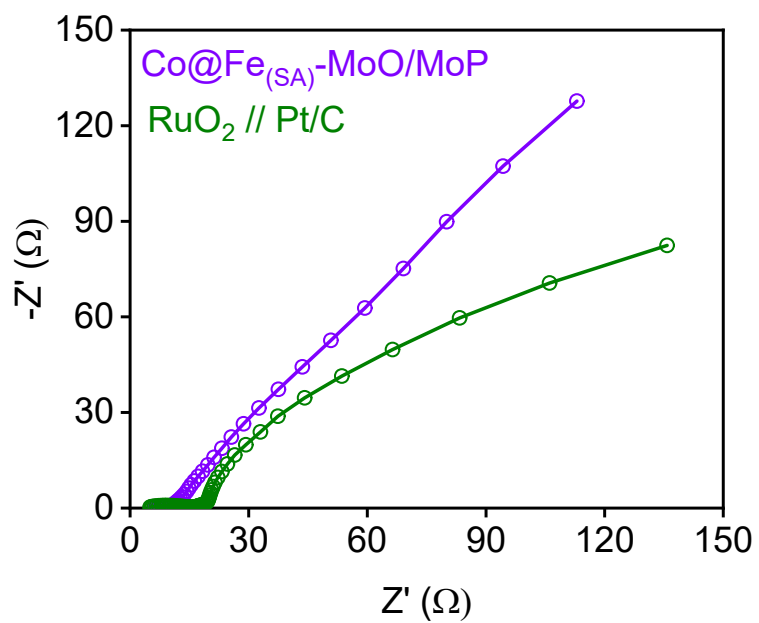

440

441 **Figure S29.** Nyquist plots of impedance spectra at 2.11 V

442 **Table S1.** Comparison of the HER overpotentials in 1.0 M KOH between Co@Fe<sub>(SA)</sub>-MoO/MoP and  
 443 recent reported electrocatalysts.

| Catalysts                                                              | $\eta_{100}$ (mV) | $\eta_{200}$ (mV) | Tafel slope<br>(mV dec <sup>-1</sup> ) | References                                       |
|------------------------------------------------------------------------|-------------------|-------------------|----------------------------------------|--------------------------------------------------|
| Co@Fe <sub>(SA)</sub> -MoO/MoP                                         | <b>36</b>         | <b>57</b>         | <b>32</b>                              | <b><i>This work</i></b>                          |
| NiP <sub>2</sub> /NiSe <sub>2</sub>                                    | 89 $\eta_{10}$    | 160 $\eta_{10}$   | 65.7                                   | <i>Appl. Catal. B Environ.</i> 282 (2021) 119584 |
| 0.02 Ni-MoP                                                            | 162 $\eta_{10}$   |                   | 102.6                                  | <i>Nano Energy.</i> 70 (2020) 104445             |
| CoO/CoMoO <sub>3</sub> /Co <sub>2</sub> Mo <sub>3</sub> O <sub>8</sub> | 51 $\eta_{10}$    | 195 $\eta_{10}$   | 66                                     | <i>Nanoscale,</i> 15 (2023) 15219–15229          |
| Mo–NiCoP-3                                                             | 148 $\eta_{100}$  | ..                | 60                                     | <i>Nano-Micro Lett.</i> (2019) 11:55             |
| Mo(NiFeCo) <sub>4</sub> /Ni                                            | ...               | 200 $\eta_{2300}$ | 35                                     | <i>Adv. Funct. Mater.</i> 33 (2023) 2214412      |
| MoS <sub>2</sub> /NiPS <sub>3</sub>                                    | 112 $\eta_{10}$   |                   | 64                                     | <i>Adv. Mater.</i> 34 (2022) 2203615             |
| 10:MoCo-VS <sub>2</sub>                                                | 63 $\eta_{10}$    |                   | 50                                     | <i>J. Mater. Chem. A,</i> 10 (2022) 9067-9079.   |
| N-MoS <sub>2</sub> ·Ni <sub>3</sub> S <sub>2</sub> /NiS                | 70 $\eta_{10}$    |                   | 95.2                                   | <i>J. Mater. Chem. A,</i> 10 (2022) 11755-11765. |
| Ni <sub>3</sub> Mo <sub>3</sub> C@NPC NWs/CC                           | 215 $\eta_{100}$  | ...               | 30.9                                   | <i>ChemSusChem</i> 2018, 11, 2717 – 2723         |
| FeCoNiMo HEA                                                           | 250 $\eta_{10}$   |                   | 48.02                                  | <i>ACS Catal.</i> 12 (2022) 10808–10817.         |
| Mo-NiPx/NiSy                                                           | 137 $\eta_{10}$   | 182 $\eta_{10}$   | 49                                     | <i>Adv. Funct. Mater.</i> 31 (2021) 2101532.     |
| Mo-/Co-N-C                                                             | ...               | 230 $\eta_{1000}$ | 47                                     | <i>Adv. Funct. Mater.</i> 31 (2021) 2102285.     |

444

445

446 **Table S2.** Comparison of the OER overpotentials in 1.0 M KOH between Co@Fe<sub>(SA)</sub>-MoO/MoP  
 447 and recent reported electrocatalysts.

| Catalysts                                              | $\eta_{100}$<br>(mV) | $\eta_{200}$<br>(mV) | Tafel<br>slope | References                                            |
|--------------------------------------------------------|----------------------|----------------------|----------------|-------------------------------------------------------|
| Co@Fe <sub>(SA)</sub> -MoO/MoP                         | <b>270</b>           | <b>290</b>           | <b>38</b>      | <b><i>This work</i></b>                               |
| NW-MnCo <sub>2</sub> O <sub>4</sub> /GDY/CC            | 338 $\eta_{10}$      | 482 $\eta_{10}$      | 111            | <i>Adv. Funct. Mater.</i> 32 (2022) 2107179           |
| Co <sub>3</sub> O <sub>3.87</sub> F <sub>0.13</sub>    | 430 $\eta_{10}$      |                      | 56             | <i>Appl. Catal. B Environ.</i> 281 (2021) 119535      |
| NiP <sub>2</sub> /NiSe <sub>2</sub>                    | 250 $\eta_{10}$      | 329 $\eta_{10}$      | 71.65          | <i>Appl. Catal. B Environ.</i> 282 (2021) 1195842     |
| Co <sub>3</sub> Mo/CoMoO <sub>x</sub>                  | 256 $\eta_{10}$      | -                    | 65.3           | <i>Chemical Engineering Journal</i> 431 (2022) 133240 |
| Co <sub>2</sub> P/CoNPC                                | 326 $\eta_{10}$      | -                    | 78             | <i>Adv. Mater.</i> 32 (2020) 2003649                  |
| NiSe <sub>2</sub> /CoSe <sub>2</sub> -N                | 286 $\eta_{10}$      | -                    | 53             | <i>Adv. Mater.</i> 32 (2020) 2000607                  |
| E-Mo–NiCoP-3                                           | 364 $\eta_{100}$     |                      |                | <i>Nano-Micro Lett.</i> (2019)                        |
| MoO <sub>3</sub> /Ni–NiO                               | -                    | 347 $\eta_{10}$      | 60             | <i>Adv.Mater.</i> 32 (2020) 2003414                   |
| MoS <sub>2</sub> /NiPS <sub>3</sub>                    | 30 $\eta_{20}$       |                      | 86             | <i>Adv. Funct. Mater.</i> 34 (2023) 2214412.          |
| NiCo <sub>2</sub> O <sub>4</sub> /Co <sub>5.47</sub> N |                      | 310 $\eta_{50}$      | 55.1           | <i>Small</i> 16 (2020) 1906775.                       |

448

449

450 **Table S3.** EIS Nyquist plot fitting parameters of the synthesis catalysts in 1.0 M KOH

| Materials                               | $R_s (\Omega)$ | $C_1 (F)$ | $R_{ct} (\Omega)$ | $Q_1 (\Omega \cdot s^n, n)$ |
|-----------------------------------------|----------------|-----------|-------------------|-----------------------------|
| Co@Fe <sub>(SA)</sub> -MoO/MoP          | 1.96           | 0.0006217 | 0.68              | 0.0008523                   |
| Co@Fe <sub>(SA)</sub> -MoO <sub>x</sub> | 2.76           | 0.0008257 | 0.95              | 0.84                        |
| Co@MoO <sub>x</sub>                     | 1.88           | 0.000896  | 1.09              | 0.0001357                   |
| Co NRs                                  | 2.53           | 0.0009587 | 1.89              | 0.00088                     |
| Co-OH NRs                               | 3.024          | 0.0009877 | 2.16              | 0.0006938,0.58              |

451

452 **Table S4.**Performance comparison of our developed AEMWE with other recently reported  
 453 AEMWEs.  
 454

| Cathode catalyst                              | Anode catalyst                                   | Condition          | AEMWE Performance                   | References                                  |
|-----------------------------------------------|--------------------------------------------------|--------------------|-------------------------------------|---------------------------------------------|
| Co@Fe <sub>(SA)</sub> <sup>-</sup><br>MoO/MoP | Co@Fe <sub>(SA)</sub> <sup>-</sup><br>MoO/MoP    | 1M KOH<br>@25 °C   | 0.5A cm <sup>-2</sup><br>@2.11 V    | <i>This work</i>                            |
| NiFeS@Ti <sub>3</sub> C <sub>2</sub>          | NiFeS@Ti <sub>3</sub> C <sub>2</sub>             | 1 M KOH @<br>55° C | 0.4 A cm <sup>-2</sup> @<br>1.85 V  | <i>Appl. Catal. B 2023, 321, 122039.</i>    |
| Pt/C                                          | NiCoFe-NDA                                       | 1 M KOH @<br>50° C | 0.325 A cm <sup>-2</sup><br>@ 1.8 V | <i>Energy Environ. Sci. 2021, 14, 6546.</i> |
| Ru <sub>2</sub> P NFs                         | IrO <sub>2</sub>                                 | 1 M KOH @<br>50° C | 1 A cm <sup>-2</sup> @<br>1.86 V    | <i>Chem. Eng. J. 2021, 420, 130491.</i>     |
| MoO <sub>2</sub> /MoNi <sub>4</sub>           | HS-RuCo/NC                                       | 1 M KOH            | 1 A cm <sup>-2</sup> @<br>2.07 V    | <i>Small 2023, 19, 2207611.</i>             |
| NiFeCr-LDH                                    | Ag NP                                            | 1 M KOH @<br>40° C | 0.2 A cm <sup>-2</sup> @<br>2.21 V  | <i>Small 2022, 18, 2200303.</i>             |
| MoO <sub>2</sub> /Ni                          | Ni foam                                          | 1 M KOH @<br>60° C | 0.55 A cm <sup>-2</sup><br>@ 2 V    | <i>J. Mater Chem. A 2023, 11, 5789.</i>     |
| NiFeCo/<br>Nickel<br>Fiber Paper              | NiFe <sub>2</sub> O <sub>4</sub> /<br>Stainless- | 1 M KOH @<br>50° C | 0.88 A cm <sup>-2</sup><br>@ 2.2 V  | <i>J. Mater. Chem. A 2022, 10, 8401.</i>    |



|                       |                  |                    |                                   |                                                       |
|-----------------------|------------------|--------------------|-----------------------------------|-------------------------------------------------------|
|                       | Steel            |                    |                                   |                                                       |
| B,V-Ni <sub>2</sub> P | NiFeOOH          | 1 M KOH @<br>50° C | 1 A cm <sup>-2</sup> @<br>1.92    | <i>Small</i> <b>2023</b> , 19, 2208076.               |
| Ni-Co-S/CP            | IrO <sub>2</sub> | 1 M KOH @<br>50° C | 1.7 A cm <sup>-2</sup> @<br>2.4 V | <i>Int. J. Energy Res.</i> <b>2021</b> , 45,<br>1918. |

455

456 **Reference**

- 457 1 X. Zhu, K. Dong, D. C. Nguyen, S. Prabhakaran, D. H. Kim, D. T. Tran, N. H. Kim and J. H. Lee,  
458 *J Mater Chem A Mater*, DOI:10.1039/d4ta02881c.
- 459 2 P. P. Dhakal, U. N. Pan, M. R. Kandel, R. B. Ghising, S. Prabhakaran, D. H. Kim, N. H. Kim and  
460 J. H. Lee, *Compos B Eng*, DOI:10.1016/j.compositesb.2024.111640.
- 461 3 N. K. Shrestha, S. A. Patil, J. Han, S. Cho, A. I. Inamdar, H. Kim and H. Im, *J Mater Chem A*  
462 *Mater*, 2022, **10**, 8989–9000.
- 463 4 M. R. Kandel, U. N. Pan, P. P. Dhakal, R. B. Ghising, T. T. Nguyen, J. Zhao, N. H. Kim and J. H.  
464 Lee, *Appl Catal B*, DOI:10.1016/j.apcatb.2023.122680.
- 465 5 P. K. L. Tran, T. H. Nguyen, D. T. Tran, V. A. Dinh, T. T. Nga Ta, C. L. Dong, N. H. Kim and J. H.  
466 Lee, *Appl Catal B*, DOI:10.1016/j.apcatb.2024.124801.
- 467 6 K. D. Tran, T. H. Nguyen, D. T. Tran, V. A. Dinh, N. H. Kim and J. H. Lee, *ACS Nano*, 2024, **18**,  
468 16222–16235.
- 469 7 P. E. Blochl, *Projector augmented-wave method*, vol. 50.
- 470 8 J. P. Perdew, K. Burke and M. Ernzerhof, *Generalized Gradient Approximation Made Simple*,  
471 1996.
- 472 9 G. Kresse and J. Furthmü, *Efficient iterative schemes for ab initio total-energy calculations*  
473 *using a plane-wave basis set*, 1996.
- 474 10 S. Grimme, J. Antony, S. Ehrlich and H. Krieg, *Journal of Chemical Physics*,  
475 DOI:10.1063/1.3382344.
- 476
